# Supplementary material for: The effect of empagliflozin on oxidative nucleic acid modifications in patients with type 2 diabetes: protocol for a randomised, double-blinded, placebo-controlled trial
Source: PubMed Central journal article supplement — BMJ Open. 2017 May 9;7(5):e014728. doi: 10.1136/bmjopen-2016-014728 (PMC5623443; doi:10.1136/bmjopen-2016-014728), 2017-05-09
Supplement: bmjopen-2016-014728.draft_revisions.pdf [file bmjopen-2016-014728.draft_revisions.pdf]

# BMJ Open

## The effect of empagliflozin on oxidative nucleic acid modifications in patients with type 2 diabetes: protocol for a randomised, double-blinded, placebo-controlled trial

|                                 |                                                                                                                                                                                                                                                                                                                                                                                                                                                                                                                                                                                                                                                                                                                                                                                                                                                                                                                                                                                                      |
|---------------------------------|------------------------------------------------------------------------------------------------------------------------------------------------------------------------------------------------------------------------------------------------------------------------------------------------------------------------------------------------------------------------------------------------------------------------------------------------------------------------------------------------------------------------------------------------------------------------------------------------------------------------------------------------------------------------------------------------------------------------------------------------------------------------------------------------------------------------------------------------------------------------------------------------------------------------------------------------------------------------------------------------------|
| Journal:                        | <i>BMJ Open</i>                                                                                                                                                                                                                                                                                                                                                                                                                                                                                                                                                                                                                                                                                                                                                                                                                                                                                                                                                                                      |
| Manuscript ID                   | bmjopen-2016-014728                                                                                                                                                                                                                                                                                                                                                                                                                                                                                                                                                                                                                                                                                                                                                                                                                                                                                                                                                                                  |
| Article Type:                   | Protocol                                                                                                                                                                                                                                                                                                                                                                                                                                                                                                                                                                                                                                                                                                                                                                                                                                                                                                                                                                                             |
| Date Submitted by the Author:   | 14-Oct-2016                                                                                                                                                                                                                                                                                                                                                                                                                                                                                                                                                                                                                                                                                                                                                                                                                                                                                                                                                                                          |
| Complete List of Authors:       | Larsen, Emil List; Rigshospitalet - Bispebjerg Frederiksberg Hospital, Laboratory & Department of Clinical Pharmacology<br>Cejvanovic, Vanja; Rigshospitalet - Bispebjerg Frederiksberg Hospital, Laboratory & Department of Clinical Pharmacology<br>Kjær, Laura; Rigshospitalet - Bispebjerg Frederiksberg Hospital, Laboratory & Department of Clinical Pharmacology<br>Vilbøll, Tina; Gentofte Hospital, University of Copenhagen, Center for Diabetes Research, Department of Internal Medicine<br>Knop, Filip; Gentofte Hospital, University of Copenhagen, Diabetes Research Division, Department of Internal Medicine<br>Rungby, Jørgen; Gentofte Hospital, University of Copenhagen, Center for Diabetes Research, Department of Internal Medicine; Aarhus University, Department of Biomedicine<br>Poulsen, Henrik; Rigshospitalet - Bispebjerg Frederiksberg Hospital, Laboratory & Department of Clinical Pharmacology; University of Copenhagen, Faculty of Health and Medical Sciences |
| <b>Primary Subject Heading</b>: | Diabetes and endocrinology                                                                                                                                                                                                                                                                                                                                                                                                                                                                                                                                                                                                                                                                                                                                                                                                                                                                                                                                                                           |
| Secondary Subject Heading:      | Pharmacology and therapeutics                                                                                                                                                                                                                                                                                                                                                                                                                                                                                                                                                                                                                                                                                                                                                                                                                                                                                                                                                                        |
| Keywords:                       | Diabetes Mellitus, Type 2, Empagliflozin, Oxidative modifications, Oxidative Nucleic Acid Modifications, 8-oxo-7,8-dihydro-2'-deoxyguanosine, 8-oxo-7,8-dihydroguanosine                                                                                                                                                                                                                                                                                                                                                                                                                                                                                                                                                                                                                                                                                                                                                                                                                             |
|                                 |                                                                                                                                                                                                                                                                                                                                                                                                                                                                                                                                                                                                                                                                                                                                                                                                                                                                                                                                                                                                      |

SCHOLARONE™  
Manuscripts

1  
2  
3  
4 **1 The effect of empagliflozin on oxidative nucleic acid modifications in patients**  
5 **2 with type 2 diabetes: protocol for a randomised, double-blinded, placebo-**  
6 **3 controlled trial**

8  
9  
10 **5 Emil List Larsen<sup>1,2,4</sup>, Vanja Cejvanovic<sup>1,2,3,6</sup> Laura Kofoed Kjær<sup>1,2,3,6</sup>, Tina Vilsbøll<sup>4</sup>,**  
11 **6 Filip Krag Knop<sup>4</sup>, Jørgen Rungby<sup>4,5</sup>, Henrik Enghusen Poulsen<sup>1,2,3\*</sup>**  
12

13 <sup>1</sup>Laboratory of Clinical Pharmacology, Rigshospitalet, University of Copenhagen,  
14 Copenhagen, Denmark

15 <sup>2</sup>Department of Clinical Pharmacology, Bispebjerg and Frederiksberg Hospital, University of  
16 Copenhagen, Copenhagen, Denmark

17 <sup>3</sup>Department of Clinical Medicine, Faculty of Health and Medical Sciences, University of  
18 Copenhagen, Copenhagen, Denmark

19 <sup>4</sup>Center for Diabetes Research, Gentofte Hospital, University of Copenhagen, Hellerup,  
20 Denmark

21 <sup>5</sup>Department of Biomedicine, Aarhus University, Aarhus, Denmark

22 <sup>6</sup>These authors contributed equally to this work  
23  
24

25  
26  
27 **\*Corresponding author**

28 Professor, Henrik Enghusen Poulsen, MD  
29 Laboratory of Clinical Pharmacology, Q7642  
30 Rigshospitalet, University of Copenhagen  
31 Ole Maaløes Vej 26, Entrance 76  
32 DK-2200 Copenhagen N  
33 Denmark

34 E-mail: [hypo@rh.dk](mailto:hypo@rh.dk)

35 Phone: +45 3545 7671

36 Fax: +45 3545 2745  
37  
38  
39

40 **Words:** 2535

41 **Figures:** 1

42 **Tables:** 0

43 **References:** 37

44 **Supplementary files:** 0  
45  
46  
47  
48  
49  
50  
51  
52  
53  
54  
55  
56  
57  
58  
59  
60

## ABSTRACT

**Introduction:** Cardiovascular disease is the leading cause of morbidity and mortality in patients with type 2 diabetes (T2D). Although glycaemic control reduces microvascular complications, the effect of intensive treatment strategies or individual drugs on macrovascular cardiovascular diseases is still debated.

Ribonucleic acid (RNA) oxidation is positively associated with mortality in patients with T2D. Inspired by animal studies showing effect of a sodium-glucose cotransporter-2 (SGLT-2) inhibitor (empagliflozin) on oxidative stress and a recent trial evaluating empagliflozin, that demonstrated improved cardiovascular outcomes in patients with T2D at high risk of cardiovascular events, we hypothesise that empagliflozin lowers oxidative stress.

**Methods and analysis:** In this randomised, double-blinded, and placebo-controlled study, 34 adult males with T2D will be randomised (1:1) to empagliflozin or placebo once-daily for 14 days as add-on to ongoing therapy. The primary endpoints will be changes in 24-hour urinary excretion of 8-oxo-7,8-dihydriguanosine (8-oxoGuo) and 8-oxo-7,8-dihydro-2'-deoxyguanosine (8-oxodG) determined before and after intervention (by ultra-performance liquid chromatography tandem mass-spectrometry). Additionally, fasting levels of malondialdehyde (MDA) will be determined in plasma before and after intervention (by high-performance liquid chromatography).

Further, the plasma levels of iron, transferrin, transferrin-saturation, and ferritin are determined to correlate the iron metabolism to the markers of oxidative modifications.

**Ethics and dissemination:** The study protocol has been approved by The Regional Committee on Biomedical Research Ethics (approval number H-16017433) and the Danish Data Protection Agency, and will be carried out under the surveillance and guidance of the GCP unit at Bispebjerg Frederiksberg Hospital, University of Copenhagen in compliance with the ICH-GCP guidelines and in accordance with the Helsinki Declaration.

The results of this study will be presented at national and international conferences, and submitted to a peer-reviewed international journal with authorship in accordance to ICMJE Recommendations state.

**Trial registration:** Study name: EMPOX; clinicaltrials.gov: NCT02890745  
Protocol version 5.1 - August, 2016.

### Article summary

#### *Strengths and limitations of this study*

► This study will investigate the effect of empagliflozin on urinary excretion of 8-oxoGuo, since 8-oxoGuo is a prognostic biomarker for mortality in patients with T2D

► The trial design will be randomised, double-blinded, and placebo-controlled

► The methods for analysis of the outcomes are precise and reliable

► The limitation of this study is, that the study outcome is not mortality in a long-term follow up, but a biomarker prognostic for mortality in patients with T2D

**Key words:** Diabetes Mellitus, Type 2; Empagliflozin; Oxidative modifications; Oxidative Nucleic Acid Modifications; 8-oxo-7,8-dihydro-2'-deoxyguanosine; 8-oxo-7,8-dihydroguanosine

1  
2  
3  
4  
5  
6  
7  
8  
9  
10  
11  
12  
13  
14  
15  
16  
17  
18  
19  
20  
21  
22  
23  
24  
25  
26  
27  
28  
29  
30  
31  
32  
33  
34  
35  
36  
37  
38  
39  
40  
41  
42  
43  
44  
45  
46  
47  
48  
49  
50  
51  
52  
53  
54  
55  
56  
57  
58  
59  
60

80 **Abbreviations:** Type 2 diabetes, T2D; Ribonucleic acid, RNA; Deoxyribonucleic acid, DNA; 8-  
81 oxo-7,8-dihydroguanosine, 8-oxoGuo; 8-oxo-7,8-dihydro-2'-deoxyguanosine, 8-oxodG;  
82 malondialdehyde, MDA; sodium/glucose cotransporter 2, SGLT-2; ultra-performance liquid  
83 chromatography tandem mass-spectrometry, UPLC-MS/MS; high-performance liquid  
84 chromatography, HPLC; 8-iso prostaglandin f2 $\alpha$ , 8-iso-PGF2 $\alpha$ ; Suspected Unexpected Serious  
85 Adverse Reactions, SUSARs.

For peer review only

## INTRODUCTION

Diabetes is an increasing health issue affecting around 422 million people in the world, a doubling in prevalence since 1980.[1] More than 90% have type 2 diabetes (T2D). Patients with T2D have increased risk of developing cardiovascular diseases.[2]

The treatment target and strategy of T2D are individualised based on disease complications and co-morbidity, with glycaemic control as the major focus.[3] Although glycaemic control reduces the risk of microvascular complications,[4] the effect of intensive treatment strategies or individual drugs on macrovascular cardiovascular diseases is still debated.[5–11]

T2D is in general characterised as a metabolic disease with insulin resistance and defect insulin production.[12] Additionally, increased oxidative nucleic acid modifications have been observed.[13–15] Of particular importance, ribonucleic acid (RNA) oxidation measured by urinary excretion of 8-oxo-7,8-dihydriguanosine (8-oxoGuo) has been shown to be associated with mortality in both newly diagnosed patients with T2D[14] and in patients with a 6-years disease duration of T2D.[15] However, still no drug treatments have been demonstrated to reduce urinary excretion of 8-oxoGuo.[16–19]

Empagliflozin is a selective sodium/glucose cotransporter 2 (SGLT-2)-inhibitor, that increases urinary excretion of glucose, and thereby improves glycaemia in patients with T2D.[20] Recently, the cardiovascular outcome trial EMPA-REG-OUTCOME study demonstrated that empagliflozin added to standard care in doses of 10 or 25 mg once-daily compared to placebo treatment reduces all-cause mortality and death from cardiovascular causes in patients with T2D and high-risk of cardiovascular disease.[21] The effect of empagliflozin occurred fast, only three months after treatment initiation.[22] The mode of action behind these effects of empagliflozin remains debated. Additional effects to empagliflozin treatment such as lowering blood pressure and increased diuresis have been suggested, but not confirmed.[23,24]

Empagliflozin reduces multiple markers of oxidative modifications in rat models of type 1 diabetes.[25,26] In addition, it has been reported that empagliflozin lowers 8-iso prostaglandin f<sub>2</sub>α (8-iso-PGF<sub>2</sub>α) (a marker of lipid peroxidation) in patients with T2D. However, the methodology, by which 8-iso-PGF<sub>2</sub>α was measured, was not reported.[27]

Several biomarkers of oxidative modifications are proven potential clinical relevant for different diseases.[28] Studies have demonstrated inconsistency between markers of oxidative modifications in different cellular compartments.[14,15,29] Hereby, this study differentiates the effect of empagliflozin on three different cellular compartments.

Iron contributes to increased levels of oxidative modifications, and iron is hypothesised to be associated with development of diabetes.[30] This study evaluates the effect of empagliflozin on the concentration of iron, transferrin, transferrin-saturation, and ferritin in order to correlate the iron metabolism to the markers of oxidative modifications.

1  
2  
3  
4 128 **Hypothesis and aims**

5 129 We hypothesise that empagliflozin lowers oxidative nucleic acid modifications, measurable  
6 130 by urinary excretion of 8-oxoGuo and 8-oxo-7,8-dihydro-2'-deoxyguanosine (8-oxodG).  
7 131 Further, we evaluate if there is a compartmentalisation of oxidative modifications in the  
8 132 organism and within the cell by also differentiate the effect of empagliflozin on lipid  
9 133 peroxidation by plasma levels of malondialdehyde (MDA).  
10 134 In addition to our primary hypothesis, this study investigates whether iron, transferrin,  
11 135 transferrin-saturation, and ferritin are correlated to the levels of oxidative modifications (8-  
12 136 oxoGuo, 8-oxodG, and MDA) in patients with T2D.  
13 137

14 138 **Study objectives**

15 139 The primary objectives are 24h urinary excretion of 8-oxoGuo and 8-oxodG before and after  
16 140 treatment with empagliflozin compared to placebo as a measurement of whole body RNA-  
17 141 and DNA oxidation, respectively.[31]  
18 142

19 143 The secondary objectives encompass the concentration of MDA in plasma before and after  
20 144 treatment with empagliflozin compared to placebo treatment as a measurement of lipid  
21 145 peroxidation.[32]

22 146 Further, this study determines the concentration of iron, transferrin, transferrin-saturation,  
23 147 and ferritin before and after the intervention.  
24  
25  
26  
27  
28  
29  
30  
31  
32  
33  
34  
35  
36  
37  
38  
39  
40  
41  
42  
43  
44  
45  
46  
47  
48  
49  
50  
51  
52  
53  
54  
55  
56  
57  
58  
59  
60

## 148 **METHODS AND ANALYSIS**

149 The protocol is developed in accordance with the SPIRIT (Standard Protocol Items:  
150 Recommendations for Interventional Trials) recommendation.[33,34]

151 The trial is registered at <http://clinicaltrials.gov> (NCT02890745). Important changes in the  
152 protocol will be registered at the website, and addressed to the Danish Medicines Authority  
153 and The Regional Committee on Biomedical Research Ethics.

154

### 155 **Trial design and setting**

156 The trial will be randomised, placebo-controlled, and double-blinded with two parallel  
157 groups.

158 Participants will be recruited from the diabetes outpatient clinic, Department of Medicine,  
159 Gentofte Hospital, University of Copenhagen, Hellerup, Denmark in relation to outpatient  
160 consultations. The recruitment continues until 34 participants successfully have completed  
161 the trial.

162

### 163 **Eligibility of participants**

#### 164 *Inclusion criteria*

165 Male diagnosed with T2D

- 166 ▶ Age: 18-75 years
- 167 ▶ HbA1c: 6.5-9.0%
- 168 ▶ Capable of understanding oral- and written information

169

#### 170 *Exclusion criteria*

- 171 ▶ Estimated glomerular filtration rate (eGFR) < 60 mL/hour/1.73 m<sup>2</sup>
- 172 ▶ Currently receiving insulin treatment
- 173 ▶ Coronary artery bypass grafting, percutaneous coronary intervention, acute coronary  
174 syndrome, stroke, lung embolism, deep vein thrombosis, or transitory cerebral ischemia  
175 within 6 months
- 176 ▶ Genital infection within 14 days
- 177 ▶ Plasma alanine aminotransferase ≥3 times upper normal limit
- 178 ▶ Treatment with SGLT-2 inhibitor within 2 months
- 179 ▶ Hyperglycaemic symptoms
- 180 ▶ Psychiatric disorder
- 181 ▶ Intolerance to empagliflozin or other agents relevant to study
- 182 ▶ Non-compliant

183

### 184 **Intervention**

185 Participants will be randomised to receive once-daily empagliflozin 25 mg or placebo (in the  
186 morning) for two weeks as add-on to ongoing therapy. Empagliflozin and placebo will be  
187 manufactured and labelled by Boehringer Ingelheim. The dosage of empagliflozin is standard  
188 medical treatment of T2D.[35] Possible administration of sulfonylurea drugs to participants  
189 will be paused one week before the start visit and during the intervention to avoid  
190 hypoglycaemia during the trial. Otherwise, there will be no restriction to concomitant  
191 treatment. Participants are encouraged not to change their lifestyle during the trial.

1  
2  
3  
4 192 Trial medicine comply Good Manufacturing Practice regulations.[36] Participants receive text  
5 193 messages reminders of medicine intake during the intervention period.  
6 194 Participants will be evaluated compliant to medicine intake at adherence level of at least  
7 195 65%.  
8 196

## 10 197 **Outcomes**

### 11 198 *Primary outcome measurements*

12 199 The primary outcome of the trial will be the difference between 24h urinary excretion of 8-  
13 200 oxoGuo and 8-oxodG before and after the intervention, which will be compared between  
14 201 the two groups.  
15 202

### 17 203 *Secondary outcome measurements*

18 204 The secondary outcome will be the difference between MDA in plasma before and after the  
19 205 intervention, which will be compared between the two groups.  
20 206 Further, this study correlates the concentration of iron, transferrin, transferrin-saturation,  
21 207 and ferritin with the urinary excretion of 8-oxoGuo and 8-oxodG.  
22 208

## 24 209 **Participant timeline**

25 210 Participant timeline is illustrated in Figure 1. Potential participants will be informed about  
26 211 the trial in relation to their outpatient consultation at the Hospital. If they are interested in  
27 212 participating, a screening visit will be conducted after informed consent. At the screening  
28 213 visit eligibility will be investigated. Blood pressure, pulse, height, and weight will be  
29 214 measured.

30 215 Participants will be fasting at the randomisation and end-of-study visit. At the randomisation  
31 216 visit, trial medicine will be dispensed to participants, 24h urine sample and a venous blood  
32 217 sample will be collected. After a 14-days treatment schedule, the end-of-study visit will take  
33 218 place. Participants will deliver the 24h urine sample and excess trial medicine, and a venous  
34 219 blood sample will be collected. All adverse events will be registered.

35 220 The 24h urine sample will be collected from the morning the day before the visit until the  
36 221 morning the day of the visit. The participant will empty his bladder before the collection of  
37 222 24h urine will begin.

38 223 The first participant's screening visit is expected to be October the 25<sup>th</sup> 2016. The last  
39 224 participant's end-of-study visit is expected to be March the 31<sup>th</sup> 2017.  
40 225

## 44 226 **Sample size**

45 227 An a priori power calculation has been performed with type I error risk of 5% and type II  
46 228 error risk of 20%.

47 229 Values of the primary outcomes are about 30 nmol per 24h. We wish to be able to detect an  
48 230 effect size of 20%. The standard deviation is 6 nmol per 24h.

49 231 The power calculation estimated 17 participants in each group using SAS version 9.4 (SAS  
50 232 Institute, Inc., Cary, NC, USA).  
51 233

## 54 234 **Assignment of intervention**

55 235 The randomisation will be carried out through a simple randomisation with a 1:1 allocation  
56 236 ratio from a computer-generated list of random numbers.  
57  
58  
59  
60



1  
2  
3  
4 237 The list of random numbers will be made by an employee who otherwise will be uninvolved  
5 238 in the study. The allocation sequence will be concealed from the investigators and  
6 239 healthcare staff enrolling and assessing participants.

8 240 The physicians responsible for the treatment of patients with T2D in the outpatient clinic will  
9 241 inform potential participants about the trial and will offer them an information meeting. At  
10 242 the information meeting EL, LK, and/or VC will inform potential participants about the trial,  
11 243 and the potential participants will receive written information as well. The screening visit will  
12 244 be performed by EL, LK, and/or VC after written informed consent is obtained. EL, JR, TV, and  
13 245 FK will be responsible for the enrolment of participants and assignment of intervention. The  
14 246 end-of-study visit will be performed by EL, LK, and/or VC. HP is sponsor-investigator of the  
15 247 study. JR is principle investigator of the study.

18 248 Only HP, EL, LK, and VC will have access to the final dataset until after analysis of the data.  
19 249 After analysis and code break of the trial all investigators have full access to the dataset.

20 250 Participants, research coordinator, investigators, and laboratorian technicians will be blinded  
21 251 until data is analysed.

22 252 Code break of a participant's trial medicine will occur only under exceptional circumstances  
23 253 when knowledge of treatment is absolutely necessary. Only the principal Investigator and an  
24 254 employee who is otherwise uninvolved in the study will be able to perform a code break.  
25 255 Since they will not be part of the data analysis, a potential code break will not be of critical  
26 256 importance.

28 257

#### 30 258 **Data collection, analysis and management**

31 259 Urine and plasma samples will be collected at the randomisation visit and the end-of-study  
32 260 visit. In order to improve adherence of the 24h urine sample, participants will receive three  
33 261 text messages reminders of the sample collection during the sample collection period. If  
34 262 participants record loss of a urine void, 150 mL will be added to the recorded diuresis.  
35 263 Participants will be evaluated compliant to 24h urinary collection at adherence level of at  
36 264 least 75%.

38 265

39 266 Urine samples will be stored at -20°C until data analysis. The samples will be analysed after  
40 267 last participant's end-of-study visit. Analysis of 8-oxoGuo and 8-oxodG will be performed by  
41 268 a method based on ultra-performance liquid chromatography tandem mass-spectrometry  
42 269 (UPLC-MS/MS) as previously described.[19]

44 270

45 271 Plasma samples will be stored at -80°C until data analysis. The samples will be analysed after  
46 272 last participant's end-of-study visit. Analysis of the plasma will be performed using a high-  
47 273 performance liquid chromatography (HPLC) method as previously described.[32]

48 274

50 275 The study will collect demographic and baseline information from the participant's  
51 276 physicians.

52 277

53 278 All data will be written in Case Report Form (CRF). CRFs will only be available for  
54 279 investigators and research coordinator, stored at trial site locked away according to ICH-GCP  
55 280 guidelines.[37] The data will be entered into a locked database by double data entry after  
56 281 last participant's end-of-study visit.

58 281

1  
2  
3  
4  
5  
6  
7  
8  
9  
10  
11  
12  
13  
14  
15  
16  
17  
18  
19  
20  
21  
22  
23  
24  
25  
26  
27  
28  
29  
30  
31  
32  
33  
34  
35  
36  
37  
38  
39  
40  
41  
42  
43  
44  
45  
46  
47  
48  
49  
50  
51  
52  
53  
54  
55  
56  
57  
58  
59  
60

282 The trial will be monitored by the GCP unit, Bispebjerg Hospital, University of Copenhagen,  
283 Copenhagen, Denmark. The GCP unit and the Danish Medicines Authority will be able to  
284 conduct an audit of the trial independent of sponsor-investigator and investigators.  
285

286 The treatment period will be short, and empagliflozin is in general well tolerated. Therefore  
287 only few adverse reactions are to be expected. Participants will be informed of possible  
288 adverse reactions and told to contact an investigator if he experiences a possible adverse  
289 reaction. Adverse events will be registered at the end-of-study visit. All adverse events will  
290 be reported to the Danish Medicines Authority and the Danish National Committee on  
291 Biomedical Research Ethics at the end of trial.

292 Fatal or life-threatening Suspected Unexpected Serious Adverse Reactions (SUSARs) will be  
293 reported to Danish Medicines Authority and the Danish National Committee on Biomedical  
294 Research Ethics within 7 days. Other SUSARs will be reported to Danish Medicines Authority  
295 and the Danish National Committee on Biomedical Research Ethics within 15 days.  
296 The participants will be insured by the Capital Region of Denmark, Gentofte Hospital.  
297 Principal investigator will have the final decision on whether an adverse event requires  
298 additional treatment, exclusion from the trial, or termination the entire trial.  
299

### 300 **Statistical analysis**

301 All analyses will be conducted per-protocol. Any drop-out of the trial will be described in the  
302 results.

303 Baseline demographic and clinical characteristics will be compared using a Student's t-test. If  
304 the two groups are not equal after randomisation in aspect of demographic or clinical  
305 parameters, then a logistic regression will be used to correlate the result for these  
306 parameters.

307 The difference in primary and secondary outcomes before and after intervention will be  
308 compared between the groups using Student's t-test.

309 Data will be evaluated for normal distribution using graphical illustration and the Shapiro-  
310 Wilk test, and further validated using a non-parametric test. If data are not normally  
311 distributed, data will be log-transformed before analyses or subjected to a non-parametric  
312 test for analysis.

313 A two-sided *P*-value <0.05 will be considered statistically significant.  
314

### 315 **The strengths and limitations of this study**

316 The strength of this study is the randomised, placebo-controlled, double-blinded trial design.  
317 The biomarker 8-oxoGuo is prognostic for mortality in patients with T2D, and the methods  
318 for analysis of both primary and secondary outcomes are precise and reliable.  
319 The limitation of this study is that the study outcome is not mortality with a long-term follow  
320 up, but a biomarker prognostic for mortality in patients with T2D.

1  
2  
3  
4 321 **ETHICS AND DISSEMINATION**

5 322 The study has received approval from The Regional Committee on Biomedical Research  
6 323 Ethics (approval number H-16017433), the Danish Medicines Authority, and the Danish Data  
7 324 Protection Agency. The study is performed with informed consent from participants in  
8 325 agreement to the declaration of Helsinki.

9  
10  
11 326 Additional plasma samples will be stored at -80°C for use in future research, locked away at  
12 327 the Department of Pharmacology, University Hospital Rigshospitalet.

13 328 The results of the study will be presented at national and international conferences, and  
14 329 submitted at a peer-review international journal.  
15  
16  
17  
18  
19  
20  
21  
22  
23  
24  
25  
26  
27  
28  
29  
30  
31  
32  
33  
34  
35  
36  
37  
38  
39  
40  
41  
42  
43  
44  
45  
46  
47  
48  
49  
50  
51  
52  
53  
54  
55  
56  
57  
58  
59  
60

1  
2  
3  
4  
5  
6  
7  
8  
9  
10  
11  
12  
13  
14  
15  
16  
17  
18  
19  
20  
21  
22  
23  
24  
25  
26  
27  
28  
29  
30  
31  
32  
33  
34  
35  
36  
37  
38  
39  
40  
41  
42  
43  
44  
45  
46  
47  
48  
49  
50  
51  
52  
53  
54  
55  
56  
57  
58  
59  
60**330 Contributors**

331 This study is based on an idea of HP. HP, EL, VC, LK, TV, FK, and JR contributed to the trial  
332 design. EL wrote the first protocol draft. HP, VC, LK, TV, FK, and JR contributed to  
333 development of study protocol and approved the final draft.

334

**335 Competing interests**

336 JR has received lecture fees from AstraZeneca, Boehringer Ingelheim Pharmaceuticals, Eli  
337 Lilly and Company, Merck Sharp & Dohme, Novo Nordisk, Sanofi, and is a member of the  
338 Advisory boards of Novo Nordisk, Merck Sharp & Dohme and Sanofi.

339 TV has received lecture fees from AstraZeneca, Boehringer Ingelheim Pharmaceuticals,  
340 Bristol-Myers Squibb, Eli Lilly and Company, Merck Sharp & Dohme, Novo Nordisk, Novartis,  
341 Sanofi, and Zealand Pharma, and is member of the Advisory Boards of Amgen, Novo Nordisk,  
342 Merck Sharp & Dohme and Bristol-Myers Squibb/AstraZeneca.

343 FK has received lecture fees from, is a member of the Advisory Boards of, has consulted for,  
344 and/or received research support from AstraZeneca, Boehringer Ingelheim Pharmaceuticals,  
345 Eli Lilly, Gilead Sciences, Merck Sharp & Dohme, Novo Nordisk, Ono Pharmaceuticals, Sanofi  
346 and Zealand Pharma.

347 EL has received a 12 months scholarship from Boehringer Ingelheim.  
348 All other authors declare no conflict of interest.

349

**350 Funding**

351 This study is sponsor-investigator-initiated and investigator-driven and financed by a  
352 unrestricted grant from Boehringer Ingelheim. Empagliflozin and placebo are manufactured  
353 and provided by Boehringer Ingelheim.

354 VC has received the Faculty PhD Scholarship from the Faculty of Health and Medical  
355 Sciences, University of Copenhagen.

356

**357 Data sharing statement**

358 HP, EL, LK, and VC will have access to the final dataset. After analysis and code break of the  
359 trial all investigators have full access to the dataset.

360 The results of the study will be presented at national and international conferences, and  
361 submitted at a peer-review international journal.

## 362 REFERENCES

- 363 1 World Health Organization. Global Report on Diabetes. Published Online First:  
364 2016.[http://apps.who.int/iris/bitstream/10665/204871/1/9789241565257\\_eng.pdf](http://apps.who.int/iris/bitstream/10665/204871/1/9789241565257_eng.pdf)
- 365 2 Shah AD, Langenberg C, Rapsomaniki E, et al. Type 2 diabetes and incidence of  
366 cardiovascular diseases: A cohort study in 1.9 million people. *Lancet Diabetes*  
367 *Endocrinol* 2015;**3**:105–14. doi:10.1016/S2213-8587(14)70219-0
- 368 3 Inzucchi SE, Bergenstal RM, Buse JB, et al. Management of hyperglycaemia in type 2  
369 diabetes, 2015: a patient-centred approach. Update to a Position Statement of the  
370 American Diabetes Association and the European Association for the Study of  
371 Diabetes. *Diabetologia* 2015;**58**:429–42. doi:10.1007/s00125-014-3460-0
- 372 4 Patel A, MacMahon S, Chalmers J, et al. Intensive blood glucose control and vascular  
373 outcomes in patients with type 2 diabetes. (ADVANCE Trial). *N Engl J Med*  
374 2008;**358**:2560–72. doi:10.1056/NEJMoa0802987
- 375 5 Turnbull FM, Abraira C, Anderson RJ, et al. Intensive glucose control and  
376 macrovascular outcomes in type 2 diabetes. *Diabetologia* 2009;**52**:2288–98.  
377 doi:10.1007/s00125-009-1470-0
- 378 6 Currie CJ, Peters JR, Tynan A, et al. Survival as a function of HbA1c in people with type  
379 2 diabetes: a retrospective cohort study. *Lancet* 2010;**375**:481–9. doi:10.1016/S0140-  
380 6736(09)61969-3
- 381 7 Scirica BM, Bhatt DL, Braunwald E, et al. Saxagliptin and cardiovascular outcomes in  
382 patients with type 2 diabetes mellitus. *N Engl J Med* 2013;**369**:1317–26.  
383 doi:10.1056/NEJMoa1307684
- 384 8 White WB, Cannon CP, Heller SR, et al. Alogliptin after Acute Coronary Syndrome in  
385 Patients with Type 2 Diabetes. *N Engl J Med* 2013;**369**:1327–35.  
386 doi:10.1056/NEJMoa1305889
- 387 9 Green JB, Bethel MA, Armstrong PW, et al. Effect of Sitagliptin on Cardiovascular  
388 Outcomes in Type 2 Diabetes. *N Engl J Med* 2015;**373**:150608133014007.  
389 doi:10.1056/NEJMoa1501352
- 390 10 Pfeffer MA, Claggett B, Diaz R, et al. Lixisenatide in Patients with Type 2 Diabetes and  
391 Acute Coronary Syndrome. *N Engl J Med* 2015;**373**:2247–57.  
392 doi:10.1056/NEJMoa1509225
- 393 11 Gæde P, Oellgaard J, Carstensen B, et al. Years of life gained by multifactorial  
394 intervention in patients with type 2 diabetes mellitus and microalbuminuria : 21 years  
395 follow-up on the Steno-2 randomised trial. *Diabetologia* Published Online First: 2016.  
396 doi:10.1007/s00125-016-4065-6
- 397 12 DeFronzo RA. From the triumvirate to the ominous octet: A new paradigm for the  
398 treatment of type 2 diabetes mellitus. *Diabetes* 2009;**58**:773–95. doi:10.2337/db09-  
399 9028
- 400 13 Broedbaek K, Weimann A, Stovgaard ES, et al. Urinary 8-oxo-7,8-dihydro-2'-  
401 deoxyguanosine as a biomarker in type 2 diabetes. *Free Radic Biol Med* 2011;**51**:1473–  
402 9. doi:10.1016/j.freeradbiomed.2011.07.007
- 403 14 Broedbaek K, Siersma V, Henriksen T, et al. Urinary markers of nucleic acid oxidation  
404 and long-term mortality of newly diagnosed type 2 diabetic patients. *Diabetes Care*  
405 2011;**34**:2594–6. doi:10.2337/dc11-1620
- 406 15 Broedbaek K, Siersma V, Henriksen T, et al. Association Between Urinary Markers of

1  
2  
3  
4  
5  
6  
7  
8  
9  
10  
11  
12  
13  
14  
15  
16  
17  
18  
19  
20  
21  
22  
23  
24  
25  
26  
27  
28  
29  
30  
31  
32  
33  
34  
35  
36  
37  
38  
39  
40  
41  
42  
43  
44  
45  
46  
47  
48  
49  
50  
51  
52  
53  
54  
55  
56  
57  
58  
59  
60

- 407 Nucleic Acid Oxidation and Mortality in Type 2 Diabetes: A population-based cohort  
408 study. *Diabetes Care* 2013;**36**:669–76. doi:10.2337/dc12-0998
- 409 16 Glintborg B, Weimann A, Kensler TW, et al. Oltipraz chemoprevention trial in Qidong,  
410 People’s Republic of China: Unaltered oxidative biomarkers. *Free Radic Biol Med*  
411 2006;**41**:1010–4. doi:10.1016/j.freeradbiomed.2006.06.015
- 412 17 Broedbaek K, Henriksen T, Weimann A, et al. Long-term effects of irbesartan  
413 treatment and smoking on nucleic acid oxidation in patients with type 2 diabetes and  
414 microalbuminuria: An irbesartan in patients with type 2 diabetes and  
415 microalbuminuria (IRMA 2) substudy. *Diabetes Care* 2011;**34**:1192–8.  
416 doi:10.2337/dc10-2214
- 417 18 Poulsen HE, Specht E, Broedbaek K, et al. RNA modifications by oxidation: A novel  
418 disease mechanism? *Free Radic Biol Med* 2012;**52**:1353–61.  
419 doi:10.1016/j.freeradbiomed.2012.01.009
- 420 19 Rasmussen ST, Andersen JT, Nielsen TK, et al. Simvastatin and oxidative stress in  
421 humans: A randomized, double-blinded, placebo-controlled clinical trial. *Redox Biol*  
422 2016;**9**:32–8. doi:10.1016/j.redox.2016.05.007
- 423 20 Ferrannini E, Solini A. SGLT2 inhibition in diabetes mellitus: rationale and clinical  
424 prospects. *Nat Rev Endocrinol* 2012;**8**:495–502. doi:10.1038/nrendo.2011.243
- 425 21 Zinman B, Wanner C, Lachin JM, et al. Empagliflozin, Cardiovascular Outcomes, and  
426 Mortality in Type 2 Diabetes. *N Engl J Med* 2015;**373**:2117–28.  
427 doi:10.1056/NEJMoa1504720
- 428 22 Abdul-Ghani M, Del Prato S, Chilton R, et al. SGLT2 Inhibitors and Cardiovascular Risk:  
429 Lessons Learned From the EMPA-REG OUTCOME Study. *Diabetes Care* 2016;**39**:717–  
430 25. doi:10.2337/dc16-0041
- 431 23 Tikkanen I, Chilton R, Johansen OE. Potential role of sodium glucose cotransporter 2  
432 inhibitors in the treatment of hypertension. *Curr Opin Nephrol Hypertens* 2016;**25**:81–  
433 6. doi:10.1097/MNH.0000000000000199
- 434 24 Sattar N, McLaren J, Kristensen SL, et al. SGLT2 Inhibition and cardiovascular events:  
435 why did EMPA-REG Outcomes surprise and what were the likely mechanisms?  
436 *Diabetologia* Published Online First: 2016. doi:10.1007/s00125-016-3956-x
- 437 25 Oelze M, Kröller-Schön S, Welsch P, et al. The Sodium-Glucose Co-Transporter 2  
438 Inhibitor Empagliflozin Improves Diabetes-Induced Vascular Dysfunction in the  
439 Streptozotocin Diabetes Rat Model by Interfering with Oxidative Stress and  
440 Glucotoxicity. *PLoS One* 2014;**9**:1–13. doi:10.1371/journal.pone.0112394
- 441 26 Cheng STW, Chen L, Li SYT, et al. The Effects of Empagliflozin, an SGLT2 Inhibitor, on  
442 Pancreatic  $\beta$ -Cell Mass and Glucose Homeostasis in Type 1 Diabetes. *PLoS One*  
443 2016;**11**:1–12. doi:10.1371/journal.pone.0147391
- 444 27 Nishimura R, Tanaka Y, Koiwai K, et al. Effect of empagliflozin monotherapy on  
445 postprandial glucose and 24-hour glucose variability in Japanese patients with type 2  
446 diabetes mellitus: a randomized, double-blind, placebo-controlled, 4-week study.  
447 *Cardiovasc Diabetol* 2015;**14**:11. doi:10.1186/s12933-014-0169-9
- 448 28 Frijhoff J, Winyard PG, Zarkovic N, et al. Clinical Relevance of Biomarkers of Oxidative  
449 Stress. *Antioxid Redox Signal* 2015;**23**:1144–70. doi:10.1089/ars.2015.6317
- 450 29 Broedbaek K, Poulsen HE, Weimann A, et al. Urinary excretion of biomarkers of  
451 oxidatively damaged DNA and RNA in hereditary hemochromatosis. *Free Radic Biol*



- 1  
2  
3  
4 452 *Med* 2009;**47**:1230–3. doi:10.1016/j.freeradbiomed.2009.08.004
- 5 453 30 Stroh M, Swerdlow RH, Zhu H. Common defects of mitochondria and iron in  
6 454 neurodegeneration and diabetes (MIND): A paradigm worth exploring. *Biochem*  
7 455 *Pharmacol* 2014;**88**:573–83. doi:10.1016/j.bcp.2013.11.022
- 8 456 31 Poulsen HE, Nadal LL, Broedbaek K, et al. Detection and interpretation of 8-oxodG and  
9 457 8-oxoGua in urine, plasma and cerebrospinal fluid. *Biochim Biophys Acta - Gen Subj*  
10 458 2014;**1840**:801–8. doi:10.1016/j.bbagen.2013.06.009
- 11 459 32 Lykkesfeldt J. Determination of malondialdehyde as dithiobarbituric acid adduct in  
12 460 biological samples by HPLC with fluorescence detection: Comparison with ultraviolet-  
13 461 visible spectrophotometry. *Clin Chem* 2001;**47**:1725–7.
- 14 462 33 Chan A-W, Tetzlaff JM, Altman DG, et al. Research and Reporting Methods Annals of  
15 463 Internal Medicine SPIRIT 2013 Statement : Defining Standard Protocol Items for  
16 464 Clinical Trials. 2015;**1**. doi:10.7326/0003-4819-158-3-201302050-00583
- 17 465 34 Chan A-W, Tetzlaff JM, Gøtzsche PC, et al. SPIRIT 2013 explanation and elaboration:  
18 466 guidance for protocols of clinical trials. *BMJ* 2013;**346**:e7586. doi:10.1136/bmj.e7586
- 19 467 35 Jardiance®. <http://pro.medicin.dk/Medicin/Praeparater/7463> (accessed 10 Jun2016).
- 20 468 36 European-Commision. Good Manufacturing Practice. Medicinal Products for Human  
21 469 and Vetrinary use. Annex 13. Investigational Medicinal Prodccts 2010: ;**4**.
- 22 470 37 ICH Harmonised Tripartite Guideline. Guideline for Good Clinical Practice E6(R1). *ICH*  
23 471 *Harmon Tripart Guidel* Published Online First: 1996. doi:10.1056/NEJMp1012246  
24 472

1  
2  
3  
4  
5  
6  
7  
8  
9  
10  
11  
12  
13  
14  
15  
16  
17  
18  
19  
20  
21  
22  
23  
24  
25  
26  
27  
28  
29  
30  
31  
32  
33  
34  
35  
36  
37  
38  
39  
40  
41  
42  
43  
44  
45  
46  
47  
48  
49  
50  
51  
52  
53  
54  
55  
56  
57  
58  
59  
60

473 **FIGURE LEGENDS**

474

475 **Figure 1.** Participant timeline.

For peer review only



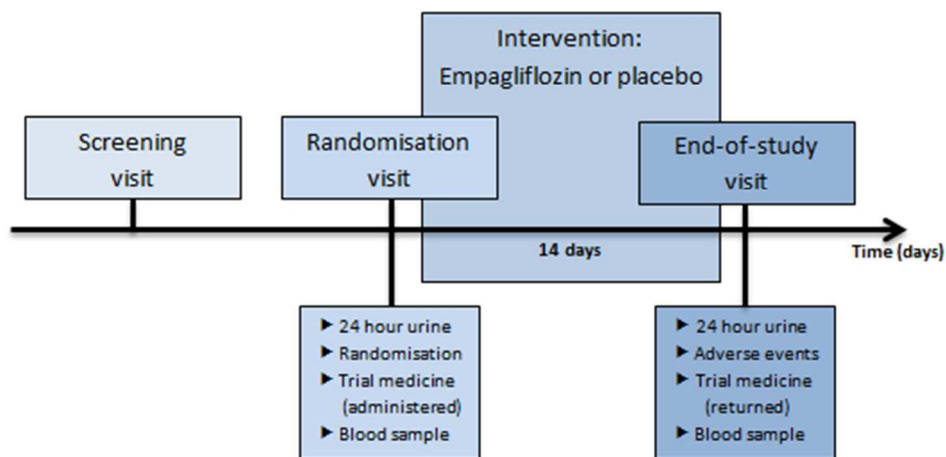

Figure 1. Participant timeline.  
Figure 1

For peer review only

1  
2  
3  
4  
5  
6  
7  
8  
9  
10  
11  
12  
13  
14  
15  
16  
17  
18  
19  
20  
21  
22  
23  
24  
25  
26  
27  
28  
29  
30  
31  
32  
33  
34  
35  
36  
37  
38  
39  
40  
41  
42  
43  
44  
45  
46  
47  
48  
49  
50  
51  
52  
53  
54  
55  
56  
57  
58  
59  
60

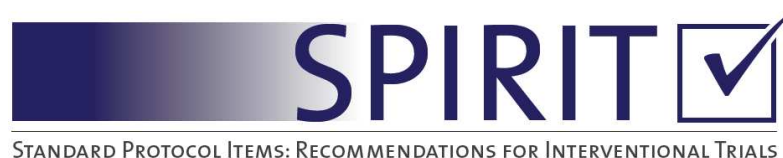

SPIRIT 2013 Checklist: Recommended items to address in a clinical trial protocol and related documents\*

| Section/item                      | Item No | Description                                                                                                                                                                                                                                                                              | Addressed on page number |
|-----------------------------------|---------|------------------------------------------------------------------------------------------------------------------------------------------------------------------------------------------------------------------------------------------------------------------------------------------|--------------------------|
| <b>Administrative information</b> |         |                                                                                                                                                                                                                                                                                          |                          |
| Title                             | 1       | Descriptive title identifying the study design, population, interventions, and, if applicable, trial acronym                                                                                                                                                                             | Page 1                   |
| Trial registration                | 2a      | Trial identifier and registry name. If not yet registered, name of intended registry                                                                                                                                                                                                     | Page 2                   |
|                                   | 2b      | All items from the World Health Organization Trial Registration Data Set                                                                                                                                                                                                                 | Not applicable           |
| Protocol version                  | 3       | Date and version identifier                                                                                                                                                                                                                                                              | Page 2                   |
| Funding                           | 4       | Sources and types of financial, material, and other support                                                                                                                                                                                                                              | Page 11                  |
| Roles and responsibilities        | 5a      | Names, affiliations, and roles of protocol contributors                                                                                                                                                                                                                                  | Page 11                  |
|                                   | 5b      | Name and contact information for the trial sponsor                                                                                                                                                                                                                                       | Page 1                   |
|                                   | 5c      | Role of study sponsor and funders, if any, in study design; collection, management, analysis, and interpretation of data; writing of the report; and the decision to submit the report for publication, including whether they will have ultimate authority over any of these activities | Page 8                   |
|                                   | 5d      | Composition, roles, and responsibilities of the coordinating centre, steering committee, endpoint adjudication committee, data management team, and other individuals or groups overseeing the trial, if applicable (see Item 21a for data monitoring committee)                         | Page 8+9                 |

## Introduction

|                                                           |     |                                                                                                                                                                                                                                                                                                                                                                                |                   |
|-----------------------------------------------------------|-----|--------------------------------------------------------------------------------------------------------------------------------------------------------------------------------------------------------------------------------------------------------------------------------------------------------------------------------------------------------------------------------|-------------------|
| Background and rationale                                  | 6a  | Description of research question and justification for undertaking the trial, including summary of relevant studies (published and unpublished) examining benefits and harms for each intervention                                                                                                                                                                             | Page 4            |
|                                                           | 6b  | Explanation for choice of comparators                                                                                                                                                                                                                                                                                                                                          | Page 4+5          |
| Objectives                                                | 7   | Specific objectives or hypotheses                                                                                                                                                                                                                                                                                                                                              | Page 5            |
| Trial design                                              | 8   | Description of trial design including type of trial (eg, parallel group, crossover, factorial, single group), allocation ratio, and framework (eg, superiority, equivalence, noninferiority, exploratory)                                                                                                                                                                      | Page 6            |
| <b>Methods: Participants, interventions, and outcomes</b> |     |                                                                                                                                                                                                                                                                                                                                                                                |                   |
| Study setting                                             | 9   | Description of study settings (eg, community clinic, academic hospital) and list of countries where data will be collected. Reference to where list of study sites can be obtained                                                                                                                                                                                             | Page 6            |
| Eligibility criteria                                      | 10  | Inclusion and exclusion criteria for participants. If applicable, eligibility criteria for study centres and individuals who will perform the interventions (eg, surgeons, psychotherapists)                                                                                                                                                                                   | Page 6            |
| Interventions                                             | 11a | Interventions for each group with sufficient detail to allow replication, including how and when they will be administered                                                                                                                                                                                                                                                     | Page 6-7          |
|                                                           | 11b | Criteria for discontinuing or modifying allocated interventions for a given trial participant (eg, drug dose change in response to harms, participant request, or improving/worsening disease)                                                                                                                                                                                 | Page 9            |
|                                                           | 11c | Strategies to improve adherence to intervention protocols, and any procedures for monitoring adherence (eg, drug tablet return, laboratory tests)                                                                                                                                                                                                                              | Page 7 + 8        |
|                                                           | 11d | Relevant concomitant care and interventions that are permitted or prohibited during the trial                                                                                                                                                                                                                                                                                  | Page 6            |
| Outcomes                                                  | 12  | Primary, secondary, and other outcomes, including the specific measurement variable (eg, systolic blood pressure), analysis metric (eg, change from baseline, final value, time to event), method of aggregation (eg, median, proportion), and time point for each outcome. Explanation of the clinical relevance of chosen efficacy and harm outcomes is strongly recommended | Page 7            |
| Participant timeline                                      | 13  | Time schedule of enrolment, interventions (including any run-ins and washouts), assessments, and visits for participants. A schematic diagram is highly recommended (see Figure)                                                                                                                                                                                               | Page 7 + Figure 1 |

|    |                                                                     |     |                                                                                                                                                                                                                                                                                                                                                                                                              |          |
|----|---------------------------------------------------------------------|-----|--------------------------------------------------------------------------------------------------------------------------------------------------------------------------------------------------------------------------------------------------------------------------------------------------------------------------------------------------------------------------------------------------------------|----------|
| 1  |                                                                     |     |                                                                                                                                                                                                                                                                                                                                                                                                              |          |
| 2  |                                                                     |     |                                                                                                                                                                                                                                                                                                                                                                                                              |          |
| 3  | Sample size                                                         | 14  | Estimated number of participants needed to achieve study objectives and how it was determined, including clinical and statistical assumptions supporting any sample size calculations                                                                                                                                                                                                                        | Page 7   |
| 4  |                                                                     |     |                                                                                                                                                                                                                                                                                                                                                                                                              |          |
| 5  |                                                                     |     |                                                                                                                                                                                                                                                                                                                                                                                                              |          |
| 6  | Recruitment                                                         | 15  | Strategies for achieving adequate participant enrolment to reach target sample size                                                                                                                                                                                                                                                                                                                          | Page 8   |
| 7  |                                                                     |     |                                                                                                                                                                                                                                                                                                                                                                                                              |          |
| 8  | <b>Methods: Assignment of interventions (for controlled trials)</b> |     |                                                                                                                                                                                                                                                                                                                                                                                                              |          |
| 9  |                                                                     |     |                                                                                                                                                                                                                                                                                                                                                                                                              |          |
| 10 | Allocation:                                                         |     |                                                                                                                                                                                                                                                                                                                                                                                                              |          |
| 11 |                                                                     |     |                                                                                                                                                                                                                                                                                                                                                                                                              |          |
| 12 | Sequence generation                                                 | 16a | Method of generating the allocation sequence (eg, computer-generated random numbers), and list of any factors for stratification. To reduce predictability of a random sequence, details of any planned restriction (eg, blocking) should be provided in a separate document that is unavailable to those who enrol participants or assign interventions                                                     | Page 7-8 |
| 13 |                                                                     |     |                                                                                                                                                                                                                                                                                                                                                                                                              |          |
| 14 |                                                                     |     |                                                                                                                                                                                                                                                                                                                                                                                                              |          |
| 15 |                                                                     |     |                                                                                                                                                                                                                                                                                                                                                                                                              |          |
| 16 |                                                                     |     |                                                                                                                                                                                                                                                                                                                                                                                                              |          |
| 17 |                                                                     |     |                                                                                                                                                                                                                                                                                                                                                                                                              |          |
| 18 | Allocation concealment mechanism                                    | 16b | Mechanism of implementing the allocation sequence (eg, central telephone; sequentially numbered, opaque, sealed envelopes), describing any steps to conceal the sequence until interventions are assigned                                                                                                                                                                                                    | Page 7-8 |
| 19 |                                                                     |     |                                                                                                                                                                                                                                                                                                                                                                                                              |          |
| 20 |                                                                     |     |                                                                                                                                                                                                                                                                                                                                                                                                              |          |
| 21 |                                                                     |     |                                                                                                                                                                                                                                                                                                                                                                                                              |          |
| 22 | Implementation                                                      | 16c | Who will generate the allocation sequence, who will enrol participants, and who will assign participants to interventions                                                                                                                                                                                                                                                                                    | Page 8   |
| 23 |                                                                     |     |                                                                                                                                                                                                                                                                                                                                                                                                              |          |
| 24 |                                                                     |     |                                                                                                                                                                                                                                                                                                                                                                                                              |          |
| 25 | Blinding (masking)                                                  | 17a | Who will be blinded after assignment to interventions (eg, trial participants, care providers, outcome assessors, data analysts), and how                                                                                                                                                                                                                                                                    | Page 8   |
| 26 |                                                                     |     |                                                                                                                                                                                                                                                                                                                                                                                                              |          |
| 27 |                                                                     |     |                                                                                                                                                                                                                                                                                                                                                                                                              |          |
| 28 |                                                                     | 17b | If blinded, circumstances under which unblinding is permissible, and procedure for revealing a participant's allocated intervention during the trial                                                                                                                                                                                                                                                         | Page 8   |
| 29 |                                                                     |     |                                                                                                                                                                                                                                                                                                                                                                                                              |          |
| 30 |                                                                     |     |                                                                                                                                                                                                                                                                                                                                                                                                              |          |
| 31 |                                                                     |     |                                                                                                                                                                                                                                                                                                                                                                                                              |          |
| 32 | <b>Methods: Data collection, management, and analysis</b>           |     |                                                                                                                                                                                                                                                                                                                                                                                                              |          |
| 33 |                                                                     |     |                                                                                                                                                                                                                                                                                                                                                                                                              |          |
| 34 | Data collection methods                                             | 18a | Plans for assessment and collection of outcome, baseline, and other trial data, including any related processes to promote data quality (eg, duplicate measurements, training of assessors) and a description of study instruments (eg, questionnaires, laboratory tests) along with their reliability and validity, if known. Reference to where data collection forms can be found, if not in the protocol | Page 8   |
| 35 |                                                                     |     |                                                                                                                                                                                                                                                                                                                                                                                                              |          |
| 36 |                                                                     |     |                                                                                                                                                                                                                                                                                                                                                                                                              |          |
| 37 |                                                                     |     |                                                                                                                                                                                                                                                                                                                                                                                                              |          |
| 38 |                                                                     |     |                                                                                                                                                                                                                                                                                                                                                                                                              |          |
| 39 |                                                                     | 18b | Plans to promote participant retention and complete follow-up, including list of any outcome data to be collected for participants who discontinue or deviate from intervention protocols                                                                                                                                                                                                                    | Page 8   |
| 40 |                                                                     |     |                                                                                                                                                                                                                                                                                                                                                                                                              |          |
| 41 |                                                                     |     |                                                                                                                                                                                                                                                                                                                                                                                                              |          |
| 42 |                                                                     |     |                                                                                                                                                                                                                                                                                                                                                                                                              |          |
| 43 |                                                                     |     |                                                                                                                                                                                                                                                                                                                                                                                                              |          |
| 44 |                                                                     |     |                                                                                                                                                                                                                                                                                                                                                                                                              |          |
| 45 |                                                                     |     |                                                                                                                                                                                                                                                                                                                                                                                                              |          |
| 46 |                                                                     |     |                                                                                                                                                                                                                                                                                                                                                                                                              |          |
| 47 |                                                                     |     |                                                                                                                                                                                                                                                                                                                                                                                                              |          |
| 48 |                                                                     |     |                                                                                                                                                                                                                                                                                                                                                                                                              |          |
| 49 |                                                                     |     |                                                                                                                                                                                                                                                                                                                                                                                                              |          |

|    |                                 |     |                                                                                                                                                                                                                                                                                                                                       |                       |
|----|---------------------------------|-----|---------------------------------------------------------------------------------------------------------------------------------------------------------------------------------------------------------------------------------------------------------------------------------------------------------------------------------------|-----------------------|
| 1  |                                 |     |                                                                                                                                                                                                                                                                                                                                       |                       |
| 2  |                                 |     |                                                                                                                                                                                                                                                                                                                                       |                       |
| 3  | Data management                 | 19  | Plans for data entry, coding, security, and storage, including any related processes to promote data quality (eg, double data entry; range checks for data values). Reference to where details of data management procedures can be found, if not in the protocol                                                                     | Page 8                |
| 4  |                                 |     |                                                                                                                                                                                                                                                                                                                                       |                       |
| 5  |                                 |     |                                                                                                                                                                                                                                                                                                                                       |                       |
| 6  |                                 |     |                                                                                                                                                                                                                                                                                                                                       |                       |
| 7  | Statistical methods             | 20a | Statistical methods for analysing primary and secondary outcomes. Reference to where other details of the statistical analysis plan can be found, if not in the protocol                                                                                                                                                              | Page 9                |
| 8  |                                 |     |                                                                                                                                                                                                                                                                                                                                       |                       |
| 9  |                                 |     |                                                                                                                                                                                                                                                                                                                                       |                       |
| 10 |                                 | 20b | Methods for any additional analyses (eg, subgroup and adjusted analyses)                                                                                                                                                                                                                                                              | Page 9                |
| 11 |                                 |     |                                                                                                                                                                                                                                                                                                                                       |                       |
| 12 |                                 | 20c | Definition of analysis population relating to protocol non-adherence (eg, as randomised analysis), and any statistical methods to handle missing data (eg, multiple imputation)                                                                                                                                                       | Page 9                |
| 13 |                                 |     |                                                                                                                                                                                                                                                                                                                                       |                       |
| 14 |                                 |     |                                                                                                                                                                                                                                                                                                                                       |                       |
| 15 |                                 |     |                                                                                                                                                                                                                                                                                                                                       |                       |
| 16 | <b>Methods: Monitoring</b>      |     |                                                                                                                                                                                                                                                                                                                                       |                       |
| 17 |                                 |     |                                                                                                                                                                                                                                                                                                                                       |                       |
| 18 | Data monitoring                 | 21a | Composition of data monitoring committee (DMC); summary of its role and reporting structure; statement of whether it is independent from the sponsor and competing interests; and reference to where further details about its charter can be found, if not in the protocol. Alternatively, an explanation of why a DMC is not needed | Page 9                |
| 19 |                                 |     |                                                                                                                                                                                                                                                                                                                                       |                       |
| 20 |                                 |     |                                                                                                                                                                                                                                                                                                                                       |                       |
| 21 |                                 |     |                                                                                                                                                                                                                                                                                                                                       |                       |
| 22 |                                 |     |                                                                                                                                                                                                                                                                                                                                       |                       |
| 23 |                                 | 21b | Description of any interim analyses and stopping guidelines, including who will have access to these interim results and make the final decision to terminate the trial                                                                                                                                                               | Page 9,<br>no interim |
| 24 |                                 |     |                                                                                                                                                                                                                                                                                                                                       |                       |
| 25 |                                 |     |                                                                                                                                                                                                                                                                                                                                       |                       |
| 26 | Harms                           | 22  | Plans for collecting, assessing, reporting, and managing solicited and spontaneously reported adverse events and other unintended effects of trial interventions or trial conduct                                                                                                                                                     | Page 8+9              |
| 27 |                                 |     |                                                                                                                                                                                                                                                                                                                                       |                       |
| 28 |                                 |     |                                                                                                                                                                                                                                                                                                                                       |                       |
| 29 | Auditing                        | 23  | Frequency and procedures for auditing trial conduct, if any, and whether the process will be independent from investigators and the sponsor                                                                                                                                                                                           | Page 9                |
| 30 |                                 |     |                                                                                                                                                                                                                                                                                                                                       |                       |
| 31 |                                 |     |                                                                                                                                                                                                                                                                                                                                       |                       |
| 32 |                                 |     |                                                                                                                                                                                                                                                                                                                                       |                       |
| 33 | <b>Ethics and dissemination</b> |     |                                                                                                                                                                                                                                                                                                                                       |                       |
| 34 |                                 |     |                                                                                                                                                                                                                                                                                                                                       |                       |
| 35 | Research ethics approval        | 24  | Plans for seeking research ethics committee/institutional review board (REC/IRB) approval                                                                                                                                                                                                                                             | Page 10               |
| 36 |                                 |     |                                                                                                                                                                                                                                                                                                                                       |                       |
| 37 |                                 |     |                                                                                                                                                                                                                                                                                                                                       |                       |
| 38 | Protocol amendments             | 25  | Plans for communicating important protocol modifications (eg, changes to eligibility criteria, outcomes, analyses) to relevant parties (eg, investigators, REC/IRBs, trial participants, trial registries, journals, regulators)                                                                                                      | Page 6                |
| 39 |                                 |     |                                                                                                                                                                                                                                                                                                                                       |                       |
| 40 |                                 |     |                                                                                                                                                                                                                                                                                                                                       |                       |
| 41 |                                 |     |                                                                                                                                                                                                                                                                                                                                       |                       |
| 42 |                                 |     |                                                                                                                                                                                                                                                                                                                                       |                       |
| 43 |                                 |     |                                                                                                                                                                                                                                                                                                                                       |                       |
| 44 |                                 |     |                                                                                                                                                                                                                                                                                                                                       |                       |
| 45 |                                 |     |                                                                                                                                                                                                                                                                                                                                       |                       |
| 46 |                                 |     |                                                                                                                                                                                                                                                                                                                                       |                       |
| 47 |                                 |     |                                                                                                                                                                                                                                                                                                                                       |                       |
| 48 |                                 |     |                                                                                                                                                                                                                                                                                                                                       |                       |
| 49 |                                 |     |                                                                                                                                                                                                                                                                                                                                       |                       |

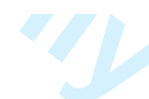

|    |                               |     |                                                                                                                                                                                                                                                                                     |                          |
|----|-------------------------------|-----|-------------------------------------------------------------------------------------------------------------------------------------------------------------------------------------------------------------------------------------------------------------------------------------|--------------------------|
| 1  |                               |     |                                                                                                                                                                                                                                                                                     |                          |
| 2  |                               |     |                                                                                                                                                                                                                                                                                     |                          |
| 3  | Consent or assent             | 26a | Who will obtain informed consent or assent from potential trial participants or authorised surrogates, and how (see Item 32)                                                                                                                                                        | Page 8                   |
| 4  |                               |     |                                                                                                                                                                                                                                                                                     |                          |
| 5  |                               |     |                                                                                                                                                                                                                                                                                     |                          |
| 6  |                               | 26b | Additional consent provisions for collection and use of participant data and biological specimens in ancillary studies, if applicable                                                                                                                                               | Page 10                  |
| 7  |                               |     |                                                                                                                                                                                                                                                                                     |                          |
| 8  |                               |     |                                                                                                                                                                                                                                                                                     |                          |
| 9  | Confidentiality               | 27  | How personal information about potential and enrolled participants will be collected, shared, and maintained in order to protect confidentiality before, during, and after the trial                                                                                                | Page 8                   |
| 10 |                               |     |                                                                                                                                                                                                                                                                                     |                          |
| 11 |                               |     |                                                                                                                                                                                                                                                                                     |                          |
| 12 | Declaration of interests      | 28  | Financial and other competing interests for principal investigators for the overall trial and each study site                                                                                                                                                                       | Page 11                  |
| 13 |                               |     |                                                                                                                                                                                                                                                                                     |                          |
| 14 |                               |     |                                                                                                                                                                                                                                                                                     |                          |
| 15 | Access to data                | 29  | Statement of who will have access to the final trial dataset, and disclosure of contractual agreements that limit such access for investigators                                                                                                                                     | Page 8                   |
| 16 |                               |     |                                                                                                                                                                                                                                                                                     |                          |
| 17 |                               |     |                                                                                                                                                                                                                                                                                     |                          |
| 18 | Ancillary and post-trial care | 30  | Provisions, if any, for ancillary and post-trial care, and for compensation to those who suffer harm from trial participation                                                                                                                                                       | Page 9                   |
| 19 |                               |     |                                                                                                                                                                                                                                                                                     |                          |
| 20 |                               |     |                                                                                                                                                                                                                                                                                     |                          |
| 21 | Dissemination policy          | 31a | Plans for investigators and sponsor to communicate trial results to participants, healthcare professionals, the public, and other relevant groups (eg, via publication, reporting in results databases, or other data sharing arrangements), including any publication restrictions | Page 10                  |
| 22 |                               |     |                                                                                                                                                                                                                                                                                     |                          |
| 23 |                               |     |                                                                                                                                                                                                                                                                                     |                          |
| 24 |                               |     |                                                                                                                                                                                                                                                                                     |                          |
| 25 |                               |     |                                                                                                                                                                                                                                                                                     |                          |
| 26 |                               | 31b | Authorship eligibility guidelines and any intended use of professional writers                                                                                                                                                                                                      | Page 2                   |
| 27 |                               |     |                                                                                                                                                                                                                                                                                     |                          |
| 28 |                               | 31c | Plans, if any, for granting public access to the full protocol, participant-level dataset, and statistical code                                                                                                                                                                     | No plans, not applicable |
| 29 |                               |     |                                                                                                                                                                                                                                                                                     |                          |
| 30 |                               |     |                                                                                                                                                                                                                                                                                     |                          |
| 31 | <b>Appendices</b>             |     |                                                                                                                                                                                                                                                                                     |                          |
| 32 |                               |     |                                                                                                                                                                                                                                                                                     |                          |
| 33 | Informed consent materials    | 32  | Model consent form and other related documentation given to participants and authorised surrogates                                                                                                                                                                                  | Appendix 1               |
| 34 |                               |     |                                                                                                                                                                                                                                                                                     |                          |
| 35 |                               |     |                                                                                                                                                                                                                                                                                     |                          |
| 36 | Biological specimens          | 33  | Plans for collection, laboratory evaluation, and storage of biological specimens for genetic or molecular analysis in the current trial and for future use in ancillary studies, if applicable                                                                                      | Page 10                  |
| 37 |                               |     |                                                                                                                                                                                                                                                                                     |                          |
| 38 |                               |     |                                                                                                                                                                                                                                                                                     |                          |

39 \*It is strongly recommended that this checklist be read in conjunction with the SPIRIT 2013 Explanation & Elaboration for important clarification on the items.  
 40 Amendments to the protocol should be tracked and dated. The SPIRIT checklist is copyrighted by the SPIRIT Group under the Creative Commons  
 41 "[Attribution-NonCommercial-NoDerivs 3.0 Unported](https://creativecommons.org/licenses/by-nc-nd/3.0/)" license.  
 42

# BMJ Open

## The effect of empagliflozin on oxidative nucleic acid modifications in patients with type 2 diabetes: protocol for a randomised, double-blinded, placebo-controlled trial

|                                 |                                                                                                                                                                                                                                                                                                                                                                                                                                                                                                                                                                                                                                                                                                                                                                                                                                                                                                                                                                                                      |
|---------------------------------|------------------------------------------------------------------------------------------------------------------------------------------------------------------------------------------------------------------------------------------------------------------------------------------------------------------------------------------------------------------------------------------------------------------------------------------------------------------------------------------------------------------------------------------------------------------------------------------------------------------------------------------------------------------------------------------------------------------------------------------------------------------------------------------------------------------------------------------------------------------------------------------------------------------------------------------------------------------------------------------------------|
| Journal:                        | <i>BMJ Open</i>                                                                                                                                                                                                                                                                                                                                                                                                                                                                                                                                                                                                                                                                                                                                                                                                                                                                                                                                                                                      |
| Manuscript ID                   | bmjopen-2016-014728.R1                                                                                                                                                                                                                                                                                                                                                                                                                                                                                                                                                                                                                                                                                                                                                                                                                                                                                                                                                                               |
| Article Type:                   | Protocol                                                                                                                                                                                                                                                                                                                                                                                                                                                                                                                                                                                                                                                                                                                                                                                                                                                                                                                                                                                             |
| Date Submitted by the Author:   | 24-Feb-2017                                                                                                                                                                                                                                                                                                                                                                                                                                                                                                                                                                                                                                                                                                                                                                                                                                                                                                                                                                                          |
| Complete List of Authors:       | Larsen, Emil List; Rigshospitalet - Bispebjerg Frederiksberg Hospital, Laboratory & Department of Clinical Pharmacology<br>Cejvanovic, Vanja; Rigshospitalet - Bispebjerg Frederiksberg Hospital, Laboratory & Department of Clinical Pharmacology<br>Kjær, Laura; Rigshospitalet - Bispebjerg Frederiksberg Hospital, Laboratory & Department of Clinical Pharmacology<br>Vilbøll, Tina; Gentofte Hospital, University of Copenhagen, Center for Diabetes Research, Department of Internal Medicine<br>Knop, Filip; Gentofte Hospital, University of Copenhagen, Diabetes Research Division, Department of Internal Medicine<br>Rungby, Jørgen; Gentofte Hospital, University of Copenhagen, Center for Diabetes Research, Department of Internal Medicine; Aarhus University, Department of Biomedicine<br>Poulsen, Henrik; Rigshospitalet - Bispebjerg Frederiksberg Hospital, Laboratory & Department of Clinical Pharmacology; University of Copenhagen, Faculty of Health and Medical Sciences |
| <b>Primary Subject Heading</b>: | Diabetes and endocrinology                                                                                                                                                                                                                                                                                                                                                                                                                                                                                                                                                                                                                                                                                                                                                                                                                                                                                                                                                                           |
| Secondary Subject Heading:      | Pharmacology and therapeutics                                                                                                                                                                                                                                                                                                                                                                                                                                                                                                                                                                                                                                                                                                                                                                                                                                                                                                                                                                        |
| Keywords:                       | Diabetes Mellitus, Type 2, Empagliflozin, Oxidative modifications, Oxidative Nucleic Acid Modifications, 8-oxo-7,8-dihydro-2'-deoxyguanosine, 8-oxo-7,8-dihydroguanosine                                                                                                                                                                                                                                                                                                                                                                                                                                                                                                                                                                                                                                                                                                                                                                                                                             |
|                                 |                                                                                                                                                                                                                                                                                                                                                                                                                                                                                                                                                                                                                                                                                                                                                                                                                                                                                                                                                                                                      |

SCHOLARONE™  
Manuscripts

1  
2  
3  
4 **1 The effect of empagliflozin on oxidative nucleic acid modifications in patients**  
5 **2 with type 2 diabetes: protocol for a randomised, double-blinded, placebo-**  
6 **3 controlled trial**

4  
5 **Emil List Larsen<sup>1,2,4</sup>, Vanja Cejvanovic<sup>1,2,3,6</sup> Laura Kofoed Kjær<sup>1,2,3,6</sup>, Tina Vilsbøll<sup>4</sup>,**  
6 **Filip Krag Knop<sup>4</sup>, Jørgen Rungby<sup>4,5</sup>, Henrik Enghusen Poulsen<sup>1,2,3\*</sup>**  
7

8 <sup>1</sup>Laboratory of Clinical Pharmacology, Rigshospitalet, University of Copenhagen,  
9 Copenhagen, Denmark

10 <sup>2</sup>Department of Clinical Pharmacology, Bispebjerg and Frederiksberg Hospital, University of  
11 Copenhagen, Copenhagen, Denmark

12 <sup>3</sup>Department of Clinical Medicine, Faculty of Health and Medical Sciences, University of  
13 Copenhagen, Copenhagen, Denmark

14 <sup>4</sup>Center for Diabetes Research, Gentofte Hospital, University of Copenhagen, Hellerup,  
15 Denmark

16 <sup>5</sup>Department of Biomedicine, Aarhus University, Aarhus, Denmark

17  
18 <sup>6</sup>These authors contributed equally to this work  
19

20 **\*Corresponding author**

21 Professor, Henrik Enghusen Poulsen, MD  
22 Laboratory of Clinical Pharmacology, Q7642  
23 Rigshospitalet, University of Copenhagen  
24 Ole Maaløes Vej 26, Entrance 76  
25 DK-2200 Copenhagen N  
26 Denmark

27 E-mail: [hypo@rh.dk](mailto:hypo@rh.dk)

28 Phone: +45 3545 7671

29 Fax: +45 3545 2745  
30

31 **Words:** 2797

32 **Figures:** 1

33 **Tables:** 0

34 **References:** 40

35 **Supplementary files:** 0



## ABSTRACT

**Introduction:** Cardiovascular disease is the leading cause of morbidity and mortality in patients with type 2 diabetes (T2D). Although glycaemic control reduces microvascular complications, the effect of intensive treatment strategies or individual drugs on macrovascular cardiovascular diseases is still debated.

Ribonucleic acid (RNA) oxidation is associated with increased mortality in patients with T2D. Inspired by animal studies showing effect of a sodium-glucose cotransporter-2 (SGLT-2) inhibitor (empagliflozin) on oxidative stress and a recent trial evaluating empagliflozin, that demonstrated improved cardiovascular outcomes in patients with T2D at high risk of cardiovascular events, we hypothesise that empagliflozin lowers oxidative stress.

**Methods and analysis:** In this randomised, double-blinded, and placebo-controlled study, 34 adult males with T2D will be randomised (1:1) to empagliflozin or placebo once-daily for 14 days as add-on to ongoing therapy. The primary endpoints will be changes in 24-hour urinary excretion of 8-oxo-7,8-dihydroguanosine (8-oxoGuo) and 8-oxo-7,8-dihydro-2'-deoxyguanosine (8-oxodG) determined before and after intervention (by ultra-performance liquid chromatography tandem mass-spectrometry). Additionally, fasting levels of malondialdehyde (MDA) will be determined in plasma before and after intervention (by high-performance liquid chromatography).

Further, the plasma levels of iron, transferrin, transferrin-saturation, and ferritin are determined to correlate the iron metabolism to the markers of oxidative modifications.

**Ethics and dissemination:** The study protocol has been approved by The Regional Committee on Biomedical Research Ethics (approval number H-16017433) and the Danish Data Protection Agency, and will be carried out under the surveillance and guidance of the GCP unit at Bispebjerg Frederiksberg Hospital, University of Copenhagen in compliance with the ICH-GCP guidelines and in accordance with the Helsinki Declaration.

The results of this study will be presented at national and international conferences, and submitted to a peer-reviewed international journal with authorship in accordance to ICMJE Recommendations state.

**Trial registration:** Study name: EMPOX; clinicaltrials.gov: NCT02890745  
Protocol version 5.1 - August, 2016.

### Article summary

#### *Strengths and limitations of this study*

► This study will investigate the effect of empagliflozin on urinary excretion of 8-oxoGuo, since 8-oxoGuo is a prognostic biomarker for mortality in patients with T2D

► The trial design will be randomised, double-blinded, and placebo-controlled

► The methods for analysis of the outcomes are precise and reliable

► The limitation of this study is, that the study outcome is not mortality in a long-term follow up, but a biomarker prognostic for mortality in patients with T2D

**Key words:** Diabetes Mellitus, Type 2; Empagliflozin; Oxidative modifications; Oxidative Nucleic Acid Modifications; 8-oxo-7,8-dihydro-2'-deoxyguanosine; 8-oxo-7,8-dihydroguanosine

1  
2  
3  
4 80 **Abbreviations:** 8-iso prostaglandin f2 $\alpha$ , 8-iso-PGF2 $\alpha$ ; 8-oxo-7,8-dihydro-2'-deoxyguanosine,  
5 81 8-oxodG; 8-oxo-7,8-dihydroguanosine, 8-oxoGuo; Deoxyribonucleic acid, DNA; high-  
6 82 performance liquid chromatography, HPLC; malondialdehyde, MDA; Ribonucleic acid, RNA;  
7 83 sodium/glucose cotransporter 2, SGLT-2; Suspected Unexpected Serious Adverse Reactions,  
8 84 SUSARs; Type 2 diabetes, T2D; ultra-performance liquid chromatography tandem mass-  
9 85 spectrometry, UPLC-MS/MS;.

10  
11  
12  
13  
14  
15  
16  
17  
18  
19  
20  
21  
22  
23  
24  
25  
26  
27  
28  
29  
30  
31  
32  
33  
34  
35  
36  
37  
38  
39  
40  
41  
42  
43  
44  
45  
46  
47  
48  
49  
50  
51  
52  
53  
54  
55  
56  
57  
58  
59  
60

For peer review only

## INTRODUCTION

Diabetes is an increasing health issue affecting around 422 million people in the world, a doubling in prevalence since 1980.[1] More than 90% have type 2 diabetes (T2D). Patients with T2D have increased risk of developing cardiovascular diseases.[2]

The treatment target and strategy of T2D are individualised based on disease complications and co-morbidity, with glycaemic control as the major focus.[3] Although glycaemic control reduces the risk of microvascular complications,[4] the effect of intensive treatment strategies or individual drugs on macrovascular cardiovascular diseases is still debated.[5–10]

T2D is in general characterised as a metabolic disease with insulin resistance and defect insulin production.[11] Additionally, increased oxidative nucleic acid modifications have been observed.[12–14] Of particular importance, ribonucleic acid (RNA) oxidation measured by urinary excretion of 8-oxo-7,8-dihydriguanosine (8-oxoGuo) has been shown to be associated with increased mortality in both newly diagnosed patients with T2D[13] and in patients with a 6-years disease duration of T2D.[14] However, still no drug treatments have been demonstrated to reduce urinary excretion of 8-oxoGuo.[15–18]

Empagliflozin is a selective sodium/glucose cotransporter 2 (SGLT-2)-inhibitor, that increases urinary excretion of glucose, and thereby improves glycaemia in patients with T2D.[19] Recently, the cardiovascular outcome trial EMPA-REG-OUTCOME study demonstrated that empagliflozin added to standard care in doses of 10 or 25 mg once-daily compared to placebo treatment reduces all-cause mortality and death from cardiovascular causes in patients with T2D and high-risk of cardiovascular disease.[20] The effect of empagliflozin occurred fast, only three months after treatment initiation.[21] The mode of action behind these effects of empagliflozin remains debated. Additional effects to empagliflozin treatment such as lowering blood pressure and increased diuresis have been suggested, but not confirmed.[22,23]

Empagliflozin reduces multiple markers of oxidative modifications in rat models of type 1 diabetes.[24,25] In addition, it has been reported that empagliflozin lowers 8-iso prostaglandin f<sub>2</sub>α (8-iso-PGF<sub>2</sub>α) (a marker of lipid peroxidation) in patients with T2D. However, the methodology, by which 8-iso-PGF<sub>2</sub>α was measured, was not reported.[26]

Several biomarkers of oxidative modifications are proven potential clinical relevant for different diseases.[27] Studies have demonstrated inconsistency between markers of oxidative modifications in different cellular compartments.[13,14,28] Hereby, this study differentiates the effect of empagliflozin on three different cellular compartments.

Iron contributes to increased levels of oxidative modifications, and iron is hypothesised to be associated with development of diabetes.[29] This study evaluates the correlation of iron, transferrin, transferrin-saturation, and ferritin with the markers of oxidative modifications.

1  
2  
3  
4 127 **Hypothesis and aims**

5 128 We hypothesise that empagliflozin lowers oxidative nucleic acid modifications, measurable  
6 129 by urinary excretion of 8-oxoGuo and 8-oxo-7,8-dihydro-2'-deoxyguanosine (8-oxodG).  
7 130 Further, we evaluate if there is a compartmentalisation of oxidative modifications in the  
8 131 organism and within the cell by also differentiate the effect of empagliflozin on lipid  
9 132 peroxidation by plasma levels of malondialdehyde (MDA).  
10 133 In addition to our primary hypothesis, this study investigates whether iron, transferrin,  
11 134 transferrin-saturation, and ferritin are correlated to the levels of oxidative modifications (8-  
12 135 oxoGuo, 8-oxodG, and MDA) in patients with T2D.  
13 136

14 137 **Study objectives**

15 138 The primary objectives are 24h urinary excretion of 8-oxoGuo and 8-oxodG before and after  
16 139 treatment with empagliflozin compared to placebo as a measurement of whole body RNA-  
17 140 and DNA oxidation, respectively.[30]  
18 141

19 142 The secondary objectives encompass the concentration of MDA in plasma before and after  
20 143 treatment with empagliflozin compared to placebo treatment as a measurement of lipid  
21 144 peroxidation.[31]

22 145 Further, this study determines the concentration of iron, transferrin, transferrin-saturation,  
23 146 and ferritin before and after the intervention to confirm and further explore the association  
24 147 between the iron metabolism and oxidative modifications.  
25  
26  
27  
28  
29  
30  
31  
32  
33  
34  
35  
36  
37  
38  
39  
40  
41  
42  
43  
44  
45  
46  
47  
48  
49  
50  
51  
52  
53  
54  
55  
56  
57  
58  
59  
60

## 148 **METHODS AND ANALYSIS**

149 The protocol is developed in accordance with the SPIRIT (Standard Protocol Items:  
150 Recommendations for Interventional Trials) recommendation.[32,33]

151 The trial is registered at <http://clinicaltrials.gov> (NCT02890745). Important changes in the  
152 protocol will be registered at the website, and addressed to the Danish Medicines Authority  
153 and The Regional Committee on Biomedical Research Ethics.

154

### 155 **Trial design and setting**

156 The trial will be randomised, placebo-controlled, and double-blinded with two parallel  
157 groups.

158 Participants will be recruited from the diabetes outpatient clinic, Department of Medicine,  
159 Gentofte Hospital, University of Copenhagen, Hellerup, Denmark in relation to outpatient  
160 consultations. The recruitment continues until 34 participants successfully have completed  
161 the trial.

162

### 163 **Eligibility of participants**

#### 164 *Inclusion criteria*

165 Male diagnosed with T2D

- 166 ▶ Age: 18-75 years
- 167 ▶ HbA1c: 6.5-9.0%
- 168 ▶ Capable of understanding oral- and written information
- 169 ▶ **Caucasian**

170

#### 171 *Exclusion criteria*

- 172 ▶ Estimated glomerular filtration rate (eGFR) < 60 mL/hour/1.73 m<sup>2</sup>
- 173 ▶ Currently receiving insulin treatment
- 174 ▶ Coronary artery bypass grafting, percutaneous coronary intervention, acute coronary  
175 syndrome, stroke, lung embolism, deep vein thrombosis, or transitory cerebral ischemia  
176 within 6 months
- 177 ▶ Genital infection within 14 days
- 178 ▶ Plasma alanine aminotransferase ≥3 times upper normal limit
- 179 ▶ Treatment with SGLT-2 inhibitor within 2 months
- 180 ▶ Hyperglycaemic symptoms
- 181 ▶ Psychiatric disorder
- 182 ▶ Intolerance to empagliflozin or other agents relevant to study
- 183 ▶ Non-compliant

184

### 185 **Intervention**

186 Participants will be randomised to receive once-daily empagliflozin 25 mg or placebo (in the  
187 morning) for two weeks as add-on to ongoing therapy. Empagliflozin and placebo will be  
188 manufactured and labelled by Boehringer Ingelheim. The dosage of empagliflozin is standard  
189 medical treatment of T2D.[34] Possible administration of sulfonylurea drugs to participants  
190 will be paused one week before the start visit and during the intervention to avoid  
191 hypoglycaemia during the trial. Otherwise, there will be no restriction to concomitant

1  
2  
3  
4 192 treatment. Participants are encouraged not to change their lifestyle (i.e. diet, exercise, and  
5 193 smoking status) during the trial.  
6 194 Trial medicine comply Good Manufacturing Practice regulations.[35] Participants receive text  
7 195 messages reminders of medicine intake during the intervention period.  
8 196 Participants will be evaluated compliant to medicine intake at adherence level of at least  
9 197 65%.  
10 198

## 11 199 **Outcomes**

### 12 200 *Primary outcome measurements*

13 201 The primary outcome of the trial will be the difference between 24h urinary excretion of 8-  
14 202 oxoGuo and 8-oxodG before and after the intervention, which will be compared between  
15 203 the two groups.  
16 204

### 17 205 *Secondary outcome measurements*

18 206 The secondary outcome will be the difference between MDA in plasma before and after the  
19 207 intervention, which will be compared between the two groups.  
20 208 Further, this study correlates the concentration of iron, transferrin, transferrin-saturation,  
21 209 and ferritin with the urinary excretion of 8-oxoGuo and 8-oxodG.  
22 210

## 23 211 **Participant timeline**

24 212 Participant timeline is illustrated in Figure 1. Potential participants will be informed about  
25 213 the trial in relation to their outpatient consultation at the Hospital. If they are interested in  
26 214 participating, a screening visit will be conducted after informed consent. At the screening  
27 215 visit eligibility will be investigated. Blood pressure, pulse, height, and weight will be  
28 216 measured.

29 217 Participants will be fasting at the randomisation and end-of-study visit. At the randomisation  
30 218 visit, trial medicine will be dispensed to participants, 24h urine sample and a venous blood  
31 219 sample will be collected. After a 14-days treatment schedule, the end-of-study visit will take  
32 220 place. Participants will deliver the 24h urine sample and excess trial medicine, and a venous  
33 221 blood sample will be collected. All adverse events will be registered.

34 222 The 24h urine sample will be collected from the morning the day before the visit until the  
35 223 morning the day of the visit. The participant will empty his bladder before the collection of  
36 224 24h urine will begin.

37 225 The first participant's screening visit is expected to be October the 25<sup>th</sup> 2016. The last  
38 226 participant's end-of-study visit is expected to be May the 31th 2017.  
39 227

## 40 228 **Sample size**

41 229 An a priori power calculation has been performed with type I error risk of 5% and type II  
42 230 error risk of 20%. Values of the primary outcomes are about 30 nmol with standard  
43 231 deviation of 6 nmol per 24h based on baseline values from the PENTRIOX trial[36].  
44 232 Smoking increases urinary excretion of 8-oxodG by 50% (95% CI 31-69%)[37]. We wish to be  
45 233 able to detect an effect size of 20%, since we do not believe smaller changes are clinical  
46 234 relevant. The type 1 and type 2 errors are set at conventional values.

47 235 The power calculation based on these assumptions estimated 17 participants in each group  
48 236 using SAS version 9.4 (SAS Institute, Inc., Cary, NC, USA).  
49  
50  
51  
52  
53  
54  
55  
56  
57  
58  
59  
60

1  
2  
3  
4 237

5 238 **Assignment of intervention**

6 239 The randomisation will be carried out through a simple randomisation with a 1:1 allocation  
7 240 ratio from a computer-generated list of random numbers.

8 241 The list of random numbers will be made by an employee who otherwise will be uninvolved  
9 242 in the study. The allocation sequence will be concealed from the investigators and  
10 243 healthcare staff enrolling and assessing participants.

11  
12  
13 244 The physicians responsible for the treatment of patients with T2D in the outpatient clinic will  
14 245 inform potential participants about the trial and will offer them an information meeting. At  
15 246 the information meeting EL, LK, and/or VC will inform potential participants about the trial,  
16 247 and the potential participants will receive written information as well. The screening visit will  
17 248 be performed by EL, LK, and/or VC after written informed consent is obtained. EL, JR, TV, and  
18 249 FK will be responsible for the enrolment of participants and assignment of intervention. The  
19 250 end-of-study visit will be performed by EL, LK, and/or VC. HP is sponsor-investigator of the  
20 251 study. JR is principle investigator of the study.

21  
22 252 Only HP, EL, LK, and VC will have access to the final dataset until after analysis of the data.  
23 253 After analysis and code break of the trial all investigators have full access to the dataset.

24 254 Participants, research coordinator, investigators, and laboratorian technicians will be blinded  
25 255 until data is analysed.

26  
27 256 Code break of a participant's trial medicine will occur only under exceptional circumstances  
28 257 when knowledge of treatment is absolutely necessary. Only the principal Investigator and an  
29 258 employee who is otherwise uninvolved in the study will be able to perform a code break.  
30 259 Since they will not be part of the data analysis, a potential code break will not be of critical  
31 260 importance.

32  
33 261

34 262 **Data collection, analysis and management**

35 263 Urine and plasma samples will be collected at the randomisation visit and the end-of-study  
36 264 visit. In order to improve adherence of the 24h urine sample, participants will receive three  
37 265 text messages reminders of the sample collection during the sample collection period. If  
38 266 participants record loss of a urine void, 150 mL will be added to the recorded diuresis.  
39 267 Participants will be evaluated compliant to 24h urinary collection at adherence level of at  
40 268 least 75%.

41  
42 269

43  
44 270 Urine samples will be stored at -20°C until data analysis. The samples will be analysed after  
45 271 last participant's end-of-study visit by ultra-performance liquid chromatography tandem  
46 272 mass spectrometry (UPLC-MS/MS). The frozen urine samples will be heated to 37°C and  
47 273 centrifuged at 10.000 g for 5 minutes prior to addition of Lithiumacetate and internal  
48 274 standard. The chromatographic separation will be performed by an Acquity UPLC I-class  
49 275 system with an Acquity UPLC BEH Shield RP18 column (1.7 µm, 2.1 x 100 mm) (Waters,  
50 276 Milford, MA, USA) with mobile phases A: 5 mM ammoniumacetate and B: Acetonitrile. The  
51 277 mass spectrometric detection will be performed by a Xevo TQ-S triple quadrupole mass  
52 278 spectrometer (Waters, Milford, MA, USA) with Intellistart function (MassLynx 4.1).[18]  
53 279 Further details of the method and quality control are described elsewhere [18]  
54 280 Liquid chromatography tandem mass spectrometry (LC-MS/MS) is the preferred method to  
55 281 determine urinary excretion of 8-oxoGuo and 8-oxodG due to the high specificity[38].  
56  
57  
58  
59  
60



1  
2  
3  
4 282  
5 283 Plasma samples will be stored at -80°C until data analysis. The samples will be analysed after  
6 284 last participant's end-of-study visit by high-performance liquid chromatography (HPLC).  
7 285 Phosphotungstic acid will be added to the samples before centrifuged for 3 minutes at  
8 286 16.000 g. Then butylated hydroxytoluene will be added to avoid further peroxidation. TBA  
9 287 reagent and acetic acid will be added and the mixture will be heated to 95°C for 60 minutes  
10 288 to form MDA(TBA)<sub>2</sub> adduct. MDA(TBA)<sub>2</sub> will be determined by HPLC with fluorescence  
11 289 detection (excitation, 515 nm; emission.[31] Further details of the method and quality  
12 290 control are described elsewhere.[31]  
13 291 The HPLC method has a high specificity, thus preferred for determining MDA[39].  
14 292

15 293 The study will collect demographic and baseline information from the participant's  
16 294 physicians.  
17 295

18 296 All data will be written in Case Report Form (CRF). CRFs will only be available for  
19 297 investigators and research coordinator, stored at trial site locked away according to ICH-GCP  
20 298 guidelines.[40] The data will be entered into a locked database by double data entry after  
21 299 last participant's end-of-study visit.

22 300 The trial will be monitored by the GCP unit, Bispebjerg Hospital, University of Copenhagen,  
23 301 Copenhagen, Denmark. The GCP unit and the Danish Medicines Authority will be able to  
24 302 conduct an audit of the trial independent of sponsor-investigator and investigators.  
25 303

26 304 The treatment period will be short, and empagliflozin is in general well tolerated. Therefore  
27 305 only few adverse reactions are to be expected. Participants will be informed of possible  
28 306 adverse reactions and told to contact an investigator if he experiences a possible adverse  
29 307 reaction. Adverse events will be registered at the end-of-study visit. All adverse events will  
30 308 be reported to the Danish Medicines Authority and the Danish National Committee on  
31 309 Biomedical Research Ethics at the end of trial.

32 310 Fatal or life-threatening Suspected Unexpected Serious Adverse Reactions (SUSARs) will be  
33 311 reported to Danish Medicines Authority and the Danish National Committee on Biomedical  
34 312 Research Ethics within 7 days. Other SUSARs will be reported to Danish Medicines Authority  
35 313 and the Danish National Committee on Biomedical Research Ethics within 15 days.  
36 314 The participants will be insured by the Capital Region of Denmark, Gentofte Hospital.  
37 315 Principal investigator will have the final decision on whether an adverse event requires  
38 316 additional treatment, exclusion from the trial, or termination the entire trial.  
39 317

#### 318 **Statistical analysis**

40 319 All analyses will be conducted per-protocol. Any drop-out of the trial will be described in the  
41 320 results.

42 321 Baseline demographic and clinical characteristics will be compared using a Student's t-test. If  
43 322 the two groups are not equal after randomisation in aspect of demographic or clinical  
44 323 parameters, then a logistic regression will be used to correlate the result for these  
45 324 parameters.

46 325 The difference in primary and secondary outcomes before and after intervention will be  
47 326 compared between the groups using Student's t-test.



1  
2  
3  
4 327 Data will be evaluated for normal distribution using graphical illustration and the Shapiro-  
5 328 Wilk test, and further validated using a non-parametric test. If data are not normally  
6 329 distributed, data will be log-transformed before analyses or subjected to a non-parametric  
7 330 test for analysis.  
8  
9 331 A two-sided *P*-value <0.05 will be considered statistically significant.  
10 332

11 333 **The strengths and limitations of this study**

12 334 The study explores if empagliflozin influences oxidation of nucleic acids as a prerequisite  
13 335 before conducting a controlled trial with oxidative stress and mortality as endpoints.  
14 336 The strength of this study is the randomised, placebo-controlled, double-blinded trial design.  
15 337 The biomarker 8-oxoGuo is prognostic for mortality in patients with T2D, and the methods  
16 338 for analysis of both primary and secondary outcomes are precise and reliable.  
17 339 The limitation of this study is that the study outcome is not mortality with a long-term follow  
18 340 up, but a biomarker prognostic for mortality in patients with T2D.  
19  
20  
21  
22  
23  
24  
25  
26  
27  
28  
29  
30  
31  
32  
33  
34  
35  
36  
37  
38  
39  
40  
41  
42  
43  
44  
45  
46  
47  
48  
49  
50  
51  
52  
53  
54  
55  
56  
57  
58  
59  
60

1  
2  
3  
4 341 **ETHICS AND DISSEMINATION**

5 342 The study has received approval from The Regional Committee on Biomedical Research  
6 343 Ethics (approval number H-16017433), the Danish Medicines Authority, and the Danish Data  
7 344 Protection Agency. The study is performed with informed consent from participants in  
8 345 agreement to the declaration of Helsinki.

9  
10  
11 346 Additional plasma samples will be stored at -80°C for use in future research, locked away at  
12 347 the Department of Pharmacology, University Hospital Rigshospitalet.

13 348 The results of the study will be presented at national and international conferences, and  
14 349 submitted at a peer-review international journal.  
15  
16  
17  
18  
19  
20  
21  
22  
23  
24  
25  
26  
27  
28  
29  
30  
31  
32  
33  
34  
35  
36  
37  
38  
39  
40  
41  
42  
43  
44  
45  
46  
47  
48  
49  
50  
51  
52  
53  
54  
55  
56  
57  
58  
59  
60

1  
2  
3  
4 350 **Contributors**

5 351 This study is based on an idea by HP. HP, EL, VC, LK, TV, FK, and JR contributed to the trial  
6 352 design. EL wrote the first protocol draft. HP, VC, LK, TV, FK, and JR contributed to  
7 353 development of study protocol and approved the final draft.  
8  
9 354

10 355 **Competing interests**

11 356 JR has received lecture fees from AstraZeneca, Boehringer Ingelheim Pharmaceuticals, Eli  
12 357 Lilly and Company, Merck Sharp & Dohme, Novo Nordisk, Sanofi, and is a member of the  
13 358 Advisory boards of Novo Nordisk, Merck Sharp & Dohme and Sanofi.

14 359 TV has received lecture fees from AstraZeneca, Boehringer Ingelheim Pharmaceuticals,  
15 360 Bristol-Myers Squibb, Eli Lilly and Company, Merck Sharp & Dohme, Novo Nordisk, Novartis,  
16 361 Sanofi, and Zealand Pharma, and is member of the Advisory Boards of Amgen, Novo Nordisk,  
17 362 Merck Sharp & Dohme and Bristol-Myers Squibb/AstraZeneca.

18 363 FK has received lecture fees from, is a member of the Advisory Boards of, has consulted for,  
19 364 and/or received research support from AstraZeneca, Boehringer Ingelheim Pharmaceuticals,  
20 365 Eli Lilly, Gilead Sciences, Merck Sharp & Dohme, Novo Nordisk, Ono Pharmaceuticals, Sanofi  
21 366 and Zealand Pharma.

22 367 EL has received a 12 months scholarship from Boehringer Ingelheim.  
23 368 All other authors declare no conflict of interest.  
24 369

25 370 **Funding**

26 371 This study is sponsor-investigator-initiated and investigator-driven and financed by a  
27 372 unrestricted grant from Boehringer Ingelheim. Empagliflozin and placebo are manufactured  
28 373 and provided by Boehringer Ingelheim.

29 374 VC has received the Faculty PhD Scholarship from the Faculty of Health and Medical  
30 375 Sciences, University of Copenhagen.  
31 376

32 377 **Data sharing statement**

33 378 HP, EL, LK, and VC will have access to the final dataset. After analysis and code break of the  
34 379 trial all investigators have full access to the dataset.

35 380 The results of the study will be presented at national and international conferences, and  
36 381 submitted at a peer-review international journal.  
37  
38  
39  
40  
41  
42  
43  
44  
45  
46  
47  
48  
49  
50  
51  
52  
53  
54  
55  
56  
57  
58  
59  
60

1  
2  
3  
4  
5  
6  
7  
8  
9  
10  
11  
12  
13  
14  
15  
16  
17  
18  
19  
20  
21  
22  
23  
24  
25  
26  
27  
28  
29  
30  
31  
32  
33  
34  
35  
36  
37  
38  
39  
40  
41  
42  
43  
44  
45  
46  
47  
48  
49  
50  
51  
52  
53  
54  
55  
56  
57  
58  
59  
60

## 382 REFERENCES

- 383 1 World Health Organization. Global Report on Diabetes. Published Online First:  
384 2016.[http://apps.who.int/iris/bitstream/10665/204871/1/9789241565257\\_eng.pdf](http://apps.who.int/iris/bitstream/10665/204871/1/9789241565257_eng.pdf)
- 385 2 Shah AD, Langenberg C, Rapsomaniki E, et al. Type 2 diabetes and incidence of  
386 cardiovascular diseases: A cohort study in 1.9 million people. *Lancet Diabetes*  
387 *Endocrinol* 2015;**3**:105–14. doi:10.1016/S2213-8587(14)70219-0
- 388 3 Inzucchi SE, Bergenstal RM, Buse JB, et al. Management of hyperglycaemia in type 2  
389 diabetes, 2015: a patient-centred approach. Update to a Position Statement of the  
390 American Diabetes Association and the European Association for the Study of  
391 Diabetes. *Diabetologia* 2015;**58**:429–42. doi:10.1007/s00125-014-3460-0
- 392 4 Patel A, MacMahon S, Chalmers J, et al. Intensive blood glucose control and vascular  
393 outcomes in patients with type 2 diabetes. (ADVANCE Trial). *N Engl J Med*  
394 2008;**358**:2560–72. doi:10.1056/NEJMoa0802987
- 395 5 Turnbull FM, Abraira C, Anderson RJ, et al. Intensive glucose control and  
396 macrovascular outcomes in type 2 diabetes. *Diabetologia* 2009;**52**:2288–98.  
397 doi:10.1007/s00125-009-1470-0
- 398 6 Currie CJ, Peters JR, Tynan A, et al. Survival as a function of HbA1c in people with type  
399 2 diabetes: a retrospective cohort study. *Lancet* 2010;**375**:481–9. doi:10.1016/S0140-  
400 6736(09)61969-3
- 401 7 Scirica BM, Bhatt DL, Braunwald E, et al. Saxagliptin and cardiovascular outcomes in  
402 patients with type 2 diabetes mellitus. *N Engl J Med* 2013;**369**:1317–26.  
403 doi:10.1056/NEJMoa1307684
- 404 8 White WB, Cannon CP, Heller SR, et al. Alogliptin after Acute Coronary Syndrome in  
405 Patients with Type 2 Diabetes. *N Engl J Med* 2013;**369**:1327–35.  
406 doi:10.1056/NEJMoa1305889
- 407 9 Green JB, Bethel MA, Armstrong PW, et al. Effect of Sitagliptin on Cardiovascular  
408 Outcomes in Type 2 Diabetes. *N Engl J Med* 2015;**373**:150608133014007.  
409 doi:10.1056/NEJMoa1501352
- 410 10 Pfeffer MA, Claggett B, Diaz R, et al. Lixisenatide in Patients with Type 2 Diabetes and  
411 Acute Coronary Syndrome. *N Engl J Med* 2015;**373**:2247–57.  
412 doi:10.1056/NEJMoa1509225
- 413 11 DeFronzo RA. From the triumvirate to the ominous octet: A new paradigm for the  
414 treatment of type 2 diabetes mellitus. *Diabetes* 2009;**58**:773–95. doi:10.2337/db09-  
415 9028
- 416 12 Broedbaek K, Weimann A, Stovgaard ES, et al. Urinary 8-oxo-7,8-dihydro-2'-  
417 deoxyguanosine as a biomarker in type 2 diabetes. *Free Radic Biol Med* 2011;**51**:1473–  
418 9. doi:10.1016/j.freeradbiomed.2011.07.007
- 419 13 Broedbaek K, Siersma V, Henriksen T, et al. Urinary Markers of Nucleic Acid Oxidation  
420 and Long-Term Mortality of Newly Diagnosed Type 2 Diabetic Patients. *Diabetes Care*  
421 2011;**34**:2594–6. doi:10.2337/dc11-1620
- 422 14 Broedbaek K, Siersma V, Henriksen T, et al. Association Between Urinary Markers of  
423 Nucleic Acid Oxidation and Mortality in Type 2 Diabetes: A population-based cohort  
424 study. *Diabetes Care* 2013;**36**:669–76. doi:10.2337/dc12-0998
- 425 15 Glintborg B, Weimann A, Kensler TW, et al. Oltipraz chemoprevention trial in Qidong,  
426 People's Republic of China: Unaltered oxidative biomarkers. *Free Radic Biol Med*

- 1  
2  
3  
4 427 2006;**41**:1010–4. doi:10.1016/j.freeradbiomed.2006.06.015
- 5 428 16 Broedbaek K, Henriksen T, Weimann A, et al. Long-term effects of irbesartan  
6 429 treatment and smoking on nucleic acid oxidation in patients with type 2 diabetes and  
7 430 microalbuminuria: An irbesartan in patients with type 2 diabetes and  
8 431 microalbuminuria (IRMA 2) substudy. *Diabetes Care* 2011;**34**:1192–8.  
9 432 doi:10.2337/dc10-2214
- 10 433 17 Poulsen HE, Specht E, Broedbaek K, et al. RNA modifications by oxidation: A novel  
11 434 disease mechanism? *Free Radic Biol Med* 2012;**52**:1353–61.  
12 435 doi:10.1016/j.freeradbiomed.2012.01.009
- 13 436 18 Rasmussen ST, Andersen JT, Nielsen TK, et al. Simvastatin and oxidative stress in  
14 437 humans: A randomized, double-blinded, placebo-controlled clinical trial. *Redox Biol*  
15 438 2016;**9**:32–8. doi:10.1016/j.redox.2016.05.007
- 16 439 19 Ferrannini E, Solini A. SGLT2 inhibition in diabetes mellitus: rationale and clinical  
17 440 prospects. *Nat Rev Endocrinol* 2012;**8**:495–502. doi:10.1038/nrendo.2011.243
- 18 441 20 Zinman B, Wanner C, Lachin JM, et al. Empagliflozin, Cardiovascular Outcomes, and  
19 442 Mortality in Type 2 Diabetes. *N Engl J Med* 2015;**373**:2117–28.  
20 443 doi:10.1056/NEJMoa1504720
- 21 444 21 Abdul-Ghani M, Del Prato S, Chilton R, et al. SGLT2 Inhibitors and Cardiovascular Risk:  
22 445 Lessons Learned From the EMPA-REG OUTCOME Study. *Diabetes Care* 2016;**39**:717–  
23 446 25. doi:10.2337/dc16-0041
- 24 447 22 Tikkanen I, Chilton R, Johansen OE. Potential role of sodium glucose cotransporter 2  
25 448 inhibitors in the treatment of hypertension. *Curr Opin Nephrol Hypertens* 2016;**25**:81–  
26 449 6. doi:10.1097/MNH.0000000000000199
- 27 450 23 Sattar N, McLaren J, Kristensen SL, et al. SGLT2 Inhibition and cardiovascular events:  
28 451 why did EMPA-REG Outcomes surprise and what were the likely mechanisms?  
29 452 *Diabetologia* Published Online First: 2016. doi:10.1007/s00125-016-3956-x
- 30 453 24 Oelze M, Kröller-Schön S, Welschop P, et al. The Sodium-Glucose Co-Transporter 2  
31 454 Inhibitor Empagliflozin Improves Diabetes-Induced Vascular Dysfunction in the  
32 455 Streptozotocin Diabetes Rat Model by Interfering with Oxidative Stress and  
33 456 Glucotoxicity. *PLoS One* 2014;**9**:1–13. doi:10.1371/journal.pone.0112394
- 34 457 25 Cheng STW, Chen L, Li SYT, et al. The Effects of Empagliflozin, an SGLT2 Inhibitor, on  
35 458 Pancreatic  $\beta$ -Cell Mass and Glucose Homeostasis in Type 1 Diabetes. *PLoS One*  
36 459 2016;**11**:1–12. doi:10.1371/journal.pone.0147391
- 37 460 26 Nishimura R, Tanaka Y, Koiwai K, et al. Effect of empagliflozin monotherapy on  
38 461 postprandial glucose and 24-hour glucose variability in Japanese patients with type 2  
39 462 diabetes mellitus: a randomized, double-blind, placebo-controlled, 4-week study.  
40 463 *Cardiovasc Diabetol* 2015;**14**:11. doi:10.1186/s12933-014-0169-9
- 41 464 27 Frijhoff J, Winyard PG, Zarkovic N, et al. Clinical Relevance of Biomarkers of Oxidative  
42 465 Stress. *Antioxid Redox Signal* 2015;**23**:1144–70. doi:10.1089/ars.2015.6317
- 43 466 28 Broedbaek K, Poulsen HE, Weimann A, et al. Urinary excretion of biomarkers of  
44 467 oxidatively damaged DNA and RNA in hereditary hemochromatosis. *Free Radic Biol*  
45 468 *Med* 2009;**47**:1230–3. doi:10.1016/j.freeradbiomed.2009.08.004
- 46 469 29 Stroh M, Swerdlow RH, Zhu H. Common defects of mitochondria and iron in  
47 470 neurodegeneration and diabetes (MIND): A paradigm worth exploring. *Biochem*  
48 471 *Pharmacol* 2014;**88**:573–83. doi:10.1016/j.bcp.2013.11.022

- 1  
2  
3  
4 472 30 Poulsen HE, Nadal LL, Broedbaek K, et al. Detection and interpretation of 8-oxodG and  
5 473 8-oxoGua in urine, plasma and cerebrospinal fluid. *Biochim Biophys Acta - Gen Subj*  
6 474 2014;**1840**:801–8. doi:10.1016/j.bbagen.2013.06.009  
7  
8 475 31 Lykkesfeldt J. Determination of malondialdehyde as dithiobarbituric acid adduct in  
9 476 biological samples by HPLC with fluorescence detection: Comparison with ultraviolet-  
10 477 visible spectrophotometry. *Clin Chem* 2001;**47**:1725–7.  
11 478 32 Chan A-W, Tetzlaff JM, Altman DG, et al. Research and Reporting Methods Annals of  
12 479 Internal Medicine SPIRIT 2013 Statement : Defining Standard Protocol Items for  
13 480 Clinical Trials. 2015;**1**. doi:10.7326/0003-4819-158-3-201302050-00583  
14 481 33 Chan A-W, Tetzlaff JM, Gøtzsche PC, et al. SPIRIT 2013 explanation and elaboration:  
15 482 guidance for protocols of clinical trials. *BMJ* 2013;**346**:e7586. doi:10.1136/bmj.e7586  
16 483 34 Jardiance®. <http://pro.medicin.dk/Medicin/Praeparater/7463> (accessed 10 Jun2016).  
17 484 35 European-Commision. Good Manufacturing Practice. Medicinal Products for Human  
18 485 and Vetrinary use. Annex 13. Investigational Medicinal Prodcnts 2010: ;**4**.  
19 486 36 Larsen EL, Cejvanovic V, Kjær LK, et al. Clarithromycin, trimethoprim, and penicillin  
20 487 and oxidative nucleic acid modifications in humans: randomised, controlled trials. *Br J*  
21 488 *Clin Pharmacol* Published Online First: 2017. doi:10.1111/bcp.13261  
22 489 37 Loft S, Vistisen K, Ewertz M, et al. Oxidative DNA damage estimated by 8-  
23 490 hydroxydeoxyguanosine excretion in humans: influence of smoking, gender and body  
24 491 mass index. *Carcinogenesis* 1992;**13**:2241–7.  
25 492 38 Weimann A, Broedbaek K, Henriksen T, et al. Assays for urinary biomarkers of  
26 493 oxidatively damaged nucleic acids. *Free Radic Res* 2012;**46**:531–40.  
27 494 doi:10.3109/10715762.2011.647693  
28 495 39 Lykkesfeldt J. Malondialdehyde as biomarker of oxidative damage to lipids caused by  
29 496 smoking. *Clin Chim Acta* 2007;**380**:50–8. doi:10.1016/j.cca.2007.01.028  
30 497 40 ICH Harmonised Tripartite Guideline. Guideline for Good Clinical Practice E6(R1). *ICH*  
31 498 *Harmon Tripart Guidel* Published Online First: 1996. doi:10.1056/NEJMp1012246  
32 499  
33  
34  
35  
36  
37  
38  
39  
40  
41  
42  
43  
44  
45  
46  
47  
48  
49  
50  
51  
52  
53  
54  
55  
56  
57  
58  
59  
60

1  
2  
3  
4 500 **FIGURE LEGENDS**

5 501

6 502 **Figure 1.** Participant timeline.  
7  
8  
9  
10  
11  
12  
13  
14  
15  
16  
17  
18  
19  
20  
21  
22  
23  
24  
25  
26  
27  
28  
29  
30  
31  
32  
33  
34  
35  
36  
37  
38  
39  
40  
41  
42  
43  
44  
45  
46  
47  
48  
49  
50  
51  
52  
53  
54  
55  
56  
57  
58  
59  
60

For peer review only

1  
2  
3  
4  
5  
6  
7  
8  
9  
10  
11  
12  
13  
14  
15  
16  
17  
18  
19  
20  
21  
22  
23  
24  
25  
26  
27  
28  
29  
30  
31  
32  
33  
34  
35  
36  
37  
38  
39  
40  
41  
42  
43  
44  
45  
46  
47  
48  
49  
50  
51  
52  
53  
54  
55  
56  
57  
58  
59  
60

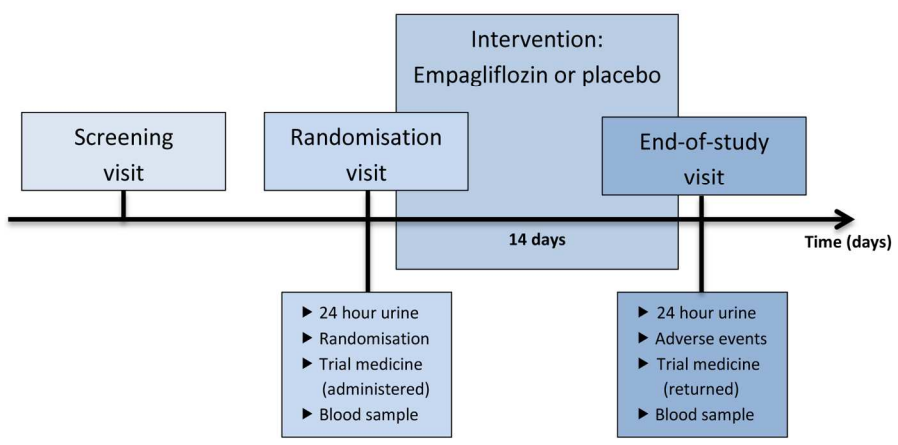

Figure 1. Participant timeline.  
Figure 1  
156x105mm (300 x 300 DPI)

view only



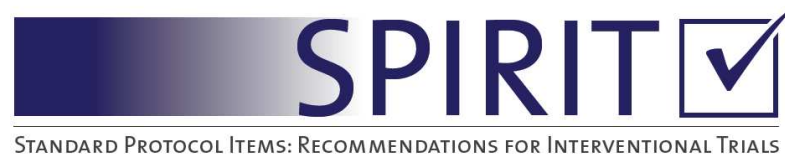

SPIRIT 2013 Checklist: Recommended items to address in a clinical trial protocol and related documents\*

| Section/item                      | Item No | Description                                                                                                                                                                                                                                                                              | Addressed on page number |
|-----------------------------------|---------|------------------------------------------------------------------------------------------------------------------------------------------------------------------------------------------------------------------------------------------------------------------------------------------|--------------------------|
| <b>Administrative information</b> |         |                                                                                                                                                                                                                                                                                          |                          |
| Title                             | 1       | Descriptive title identifying the study design, population, interventions, and, if applicable, trial acronym                                                                                                                                                                             | Page 1                   |
| Trial registration                | 2a      | Trial identifier and registry name. If not yet registered, name of intended registry                                                                                                                                                                                                     | Page 2                   |
|                                   | 2b      | All items from the World Health Organization Trial Registration Data Set                                                                                                                                                                                                                 | Not applicable           |
| Protocol version                  | 3       | Date and version identifier                                                                                                                                                                                                                                                              | Page 2                   |
| Funding                           | 4       | Sources and types of financial, material, and other support                                                                                                                                                                                                                              | Page 11                  |
| Roles and responsibilities        | 5a      | Names, affiliations, and roles of protocol contributors                                                                                                                                                                                                                                  | Page 11                  |
|                                   | 5b      | Name and contact information for the trial sponsor                                                                                                                                                                                                                                       | Page 1                   |
|                                   | 5c      | Role of study sponsor and funders, if any, in study design; collection, management, analysis, and interpretation of data; writing of the report; and the decision to submit the report for publication, including whether they will have ultimate authority over any of these activities | Page 8                   |
|                                   | 5d      | Composition, roles, and responsibilities of the coordinating centre, steering committee, endpoint adjudication committee, data management team, and other individuals or groups overseeing the trial, if applicable (see Item 21a for data monitoring committee)                         | Page 8+9                 |

1  
2  
3  
4  
5  
6  
7  
8  
9  
10  
11  
12  
13  
14  
15  
16  
17  
18  
19  
20  
21  
22  
23  
24  
25  
26  
27  
28  
29  
30  
31  
32  
33  
34  
35  
36  
37  
38  
39  
40  
41  
42  
43  
44  
45  
46  
47  
48  
49**Introduction**

|                          |    |                                                                                                                                                                                                           |          |
|--------------------------|----|-----------------------------------------------------------------------------------------------------------------------------------------------------------------------------------------------------------|----------|
| Background and rationale | 6a | Description of research question and justification for undertaking the trial, including summary of relevant studies (published and unpublished) examining benefits and harms for each intervention        | Page 4   |
|                          | 6b | Explanation for choice of comparators                                                                                                                                                                     | Page 4+5 |
| Objectives               | 7  | Specific objectives or hypotheses                                                                                                                                                                         | Page 5   |
| Trial design             | 8  | Description of trial design including type of trial (eg, parallel group, crossover, factorial, single group), allocation ratio, and framework (eg, superiority, equivalence, noninferiority, exploratory) | Page 6   |

**Methods: Participants, interventions, and outcomes**

|                      |     |                                                                                                                                                                                                                                                                                                                                                                                |                   |
|----------------------|-----|--------------------------------------------------------------------------------------------------------------------------------------------------------------------------------------------------------------------------------------------------------------------------------------------------------------------------------------------------------------------------------|-------------------|
| Study setting        | 9   | Description of study settings (eg, community clinic, academic hospital) and list of countries where data will be collected. Reference to where list of study sites can be obtained                                                                                                                                                                                             | Page 6            |
| Eligibility criteria | 10  | Inclusion and exclusion criteria for participants. If applicable, eligibility criteria for study centres and individuals who will perform the interventions (eg, surgeons, psychotherapists)                                                                                                                                                                                   | Page 6            |
| Interventions        | 11a | Interventions for each group with sufficient detail to allow replication, including how and when they will be administered                                                                                                                                                                                                                                                     | Page 6-7          |
|                      | 11b | Criteria for discontinuing or modifying allocated interventions for a given trial participant (eg, drug dose change in response to harms, participant request, or improving/worsening disease)                                                                                                                                                                                 | Page 9            |
|                      | 11c | Strategies to improve adherence to intervention protocols, and any procedures for monitoring adherence (eg, drug tablet return, laboratory tests)                                                                                                                                                                                                                              | Page 7 + 8        |
|                      | 11d | Relevant concomitant care and interventions that are permitted or prohibited during the trial                                                                                                                                                                                                                                                                                  | Page 6            |
| Outcomes             | 12  | Primary, secondary, and other outcomes, including the specific measurement variable (eg, systolic blood pressure), analysis metric (eg, change from baseline, final value, time to event), method of aggregation (eg, median, proportion), and time point for each outcome. Explanation of the clinical relevance of chosen efficacy and harm outcomes is strongly recommended | Page 7            |
| Participant timeline | 13  | Time schedule of enrolment, interventions (including any run-ins and washouts), assessments, and visits for participants. A schematic diagram is highly recommended (see Figure)                                                                                                                                                                                               | Page 7 + Figure 1 |

|   |             |    |                                                                                                                                                                                       |        |
|---|-------------|----|---------------------------------------------------------------------------------------------------------------------------------------------------------------------------------------|--------|
| 1 |             |    |                                                                                                                                                                                       |        |
| 2 |             |    |                                                                                                                                                                                       |        |
| 3 | Sample size | 14 | Estimated number of participants needed to achieve study objectives and how it was determined, including clinical and statistical assumptions supporting any sample size calculations | Page 7 |
| 4 |             |    |                                                                                                                                                                                       |        |
| 5 |             |    |                                                                                                                                                                                       |        |
| 6 | Recruitment | 15 | Strategies for achieving adequate participant enrolment to reach target sample size                                                                                                   | Page 8 |
| 7 |             |    |                                                                                                                                                                                       |        |

### 8 **Methods: Assignment of interventions (for controlled trials)**

#### 9 Allocation:

|    |                                  |     |                                                                                                                                                                                                                                                                                                                                                          |          |
|----|----------------------------------|-----|----------------------------------------------------------------------------------------------------------------------------------------------------------------------------------------------------------------------------------------------------------------------------------------------------------------------------------------------------------|----------|
| 10 |                                  |     |                                                                                                                                                                                                                                                                                                                                                          |          |
| 11 |                                  |     |                                                                                                                                                                                                                                                                                                                                                          |          |
| 12 | Sequence generation              | 16a | Method of generating the allocation sequence (eg, computer-generated random numbers), and list of any factors for stratification. To reduce predictability of a random sequence, details of any planned restriction (eg, blocking) should be provided in a separate document that is unavailable to those who enrol participants or assign interventions | Page 7-8 |
| 13 |                                  |     |                                                                                                                                                                                                                                                                                                                                                          |          |
| 14 |                                  |     |                                                                                                                                                                                                                                                                                                                                                          |          |
| 15 |                                  |     |                                                                                                                                                                                                                                                                                                                                                          |          |
| 16 |                                  |     |                                                                                                                                                                                                                                                                                                                                                          |          |
| 17 |                                  |     |                                                                                                                                                                                                                                                                                                                                                          |          |
| 18 | Allocation concealment mechanism | 16b | Mechanism of implementing the allocation sequence (eg, central telephone; sequentially numbered, opaque, sealed envelopes), describing any steps to conceal the sequence until interventions are assigned                                                                                                                                                | Page 7-8 |
| 19 |                                  |     |                                                                                                                                                                                                                                                                                                                                                          |          |
| 20 |                                  |     |                                                                                                                                                                                                                                                                                                                                                          |          |
| 21 |                                  |     |                                                                                                                                                                                                                                                                                                                                                          |          |
| 22 | Implementation                   | 16c | Who will generate the allocation sequence, who will enrol participants, and who will assign participants to interventions                                                                                                                                                                                                                                | Page 8   |
| 23 |                                  |     |                                                                                                                                                                                                                                                                                                                                                          |          |
| 24 |                                  |     |                                                                                                                                                                                                                                                                                                                                                          |          |
| 25 | Blinding (masking)               | 17a | Who will be blinded after assignment to interventions (eg, trial participants, care providers, outcome assessors, data analysts), and how                                                                                                                                                                                                                | Page 8   |
| 26 |                                  |     |                                                                                                                                                                                                                                                                                                                                                          |          |
| 27 |                                  |     |                                                                                                                                                                                                                                                                                                                                                          |          |
| 28 |                                  | 17b | If blinded, circumstances under which unblinding is permissible, and procedure for revealing a participant's allocated intervention during the trial                                                                                                                                                                                                     | Page 8   |
| 29 |                                  |     |                                                                                                                                                                                                                                                                                                                                                          |          |
| 30 |                                  |     |                                                                                                                                                                                                                                                                                                                                                          |          |
| 31 |                                  |     |                                                                                                                                                                                                                                                                                                                                                          |          |

### 32 **Methods: Data collection, management, and analysis**

|    |                         |     |                                                                                                                                                                                                                                                                                                                                                                                                              |        |
|----|-------------------------|-----|--------------------------------------------------------------------------------------------------------------------------------------------------------------------------------------------------------------------------------------------------------------------------------------------------------------------------------------------------------------------------------------------------------------|--------|
| 33 |                         |     |                                                                                                                                                                                                                                                                                                                                                                                                              |        |
| 34 | Data collection methods | 18a | Plans for assessment and collection of outcome, baseline, and other trial data, including any related processes to promote data quality (eg, duplicate measurements, training of assessors) and a description of study instruments (eg, questionnaires, laboratory tests) along with their reliability and validity, if known. Reference to where data collection forms can be found, if not in the protocol | Page 8 |
| 35 |                         |     |                                                                                                                                                                                                                                                                                                                                                                                                              |        |
| 36 |                         |     |                                                                                                                                                                                                                                                                                                                                                                                                              |        |
| 37 |                         |     |                                                                                                                                                                                                                                                                                                                                                                                                              |        |
| 38 |                         |     |                                                                                                                                                                                                                                                                                                                                                                                                              |        |
| 39 |                         | 18b | Plans to promote participant retention and complete follow-up, including list of any outcome data to be collected for participants who discontinue or deviate from intervention protocols                                                                                                                                                                                                                    | Page 8 |
| 40 |                         |     |                                                                                                                                                                                                                                                                                                                                                                                                              |        |
| 41 |                         |     |                                                                                                                                                                                                                                                                                                                                                                                                              |        |
| 42 |                         |     |                                                                                                                                                                                                                                                                                                                                                                                                              |        |
| 43 |                         |     |                                                                                                                                                                                                                                                                                                                                                                                                              |        |
| 44 |                         |     |                                                                                                                                                                                                                                                                                                                                                                                                              |        |
| 45 |                         |     |                                                                                                                                                                                                                                                                                                                                                                                                              |        |

|    |                                 |     |                                                                                                                                                                                                                                                                                                                                       |                       |
|----|---------------------------------|-----|---------------------------------------------------------------------------------------------------------------------------------------------------------------------------------------------------------------------------------------------------------------------------------------------------------------------------------------|-----------------------|
| 1  |                                 |     |                                                                                                                                                                                                                                                                                                                                       |                       |
| 2  |                                 |     |                                                                                                                                                                                                                                                                                                                                       |                       |
| 3  | Data management                 | 19  | Plans for data entry, coding, security, and storage, including any related processes to promote data quality (eg, double data entry; range checks for data values). Reference to where details of data management procedures can be found, if not in the protocol                                                                     | Page 8                |
| 4  |                                 |     |                                                                                                                                                                                                                                                                                                                                       |                       |
| 5  |                                 |     |                                                                                                                                                                                                                                                                                                                                       |                       |
| 6  |                                 |     |                                                                                                                                                                                                                                                                                                                                       |                       |
| 7  | Statistical methods             | 20a | Statistical methods for analysing primary and secondary outcomes. Reference to where other details of the statistical analysis plan can be found, if not in the protocol                                                                                                                                                              | Page 9                |
| 8  |                                 |     |                                                                                                                                                                                                                                                                                                                                       |                       |
| 9  |                                 |     |                                                                                                                                                                                                                                                                                                                                       |                       |
| 10 |                                 | 20b | Methods for any additional analyses (eg, subgroup and adjusted analyses)                                                                                                                                                                                                                                                              | Page 9                |
| 11 |                                 |     |                                                                                                                                                                                                                                                                                                                                       |                       |
| 12 |                                 | 20c | Definition of analysis population relating to protocol non-adherence (eg, as randomised analysis), and any statistical methods to handle missing data (eg, multiple imputation)                                                                                                                                                       | Page 9                |
| 13 |                                 |     |                                                                                                                                                                                                                                                                                                                                       |                       |
| 14 |                                 |     |                                                                                                                                                                                                                                                                                                                                       |                       |
| 15 |                                 |     |                                                                                                                                                                                                                                                                                                                                       |                       |
| 16 | <b>Methods: Monitoring</b>      |     |                                                                                                                                                                                                                                                                                                                                       |                       |
| 17 |                                 |     |                                                                                                                                                                                                                                                                                                                                       |                       |
| 18 | Data monitoring                 | 21a | Composition of data monitoring committee (DMC); summary of its role and reporting structure; statement of whether it is independent from the sponsor and competing interests; and reference to where further details about its charter can be found, if not in the protocol. Alternatively, an explanation of why a DMC is not needed | Page 9                |
| 19 |                                 |     |                                                                                                                                                                                                                                                                                                                                       |                       |
| 20 |                                 |     |                                                                                                                                                                                                                                                                                                                                       |                       |
| 21 |                                 |     |                                                                                                                                                                                                                                                                                                                                       |                       |
| 22 |                                 |     |                                                                                                                                                                                                                                                                                                                                       |                       |
| 23 |                                 | 21b | Description of any interim analyses and stopping guidelines, including who will have access to these interim results and make the final decision to terminate the trial                                                                                                                                                               | Page 9,<br>no interim |
| 24 |                                 |     |                                                                                                                                                                                                                                                                                                                                       |                       |
| 25 |                                 |     |                                                                                                                                                                                                                                                                                                                                       |                       |
| 26 | Harms                           | 22  | Plans for collecting, assessing, reporting, and managing solicited and spontaneously reported adverse events and other unintended effects of trial interventions or trial conduct                                                                                                                                                     | Page 8+9              |
| 27 |                                 |     |                                                                                                                                                                                                                                                                                                                                       |                       |
| 28 |                                 |     |                                                                                                                                                                                                                                                                                                                                       |                       |
| 29 | Auditing                        | 23  | Frequency and procedures for auditing trial conduct, if any, and whether the process will be independent from investigators and the sponsor                                                                                                                                                                                           | Page 9                |
| 30 |                                 |     |                                                                                                                                                                                                                                                                                                                                       |                       |
| 31 |                                 |     |                                                                                                                                                                                                                                                                                                                                       |                       |
| 32 |                                 |     |                                                                                                                                                                                                                                                                                                                                       |                       |
| 33 | <b>Ethics and dissemination</b> |     |                                                                                                                                                                                                                                                                                                                                       |                       |
| 34 |                                 |     |                                                                                                                                                                                                                                                                                                                                       |                       |
| 35 | Research ethics approval        | 24  | Plans for seeking research ethics committee/institutional review board (REC/IRB) approval                                                                                                                                                                                                                                             | Page 10               |
| 36 |                                 |     |                                                                                                                                                                                                                                                                                                                                       |                       |
| 37 |                                 |     |                                                                                                                                                                                                                                                                                                                                       |                       |
| 38 | Protocol amendments             | 25  | Plans for communicating important protocol modifications (eg, changes to eligibility criteria, outcomes, analyses) to relevant parties (eg, investigators, REC/IRBs, trial participants, trial registries, journals, regulators)                                                                                                      | Page 6                |
| 39 |                                 |     |                                                                                                                                                                                                                                                                                                                                       |                       |
| 40 |                                 |     |                                                                                                                                                                                                                                                                                                                                       |                       |
| 41 |                                 |     |                                                                                                                                                                                                                                                                                                                                       |                       |
| 42 |                                 |     |                                                                                                                                                                                                                                                                                                                                       |                       |
| 43 |                                 |     |                                                                                                                                                                                                                                                                                                                                       |                       |
| 44 |                                 |     |                                                                                                                                                                                                                                                                                                                                       |                       |
| 45 |                                 |     |                                                                                                                                                                                                                                                                                                                                       |                       |
| 46 |                                 |     |                                                                                                                                                                                                                                                                                                                                       |                       |
| 47 |                                 |     |                                                                                                                                                                                                                                                                                                                                       |                       |
| 48 |                                 |     |                                                                                                                                                                                                                                                                                                                                       |                       |
| 49 |                                 |     |                                                                                                                                                                                                                                                                                                                                       |                       |



|    |                               |     |                                                                                                                                                                                                                                                                                     |                          |
|----|-------------------------------|-----|-------------------------------------------------------------------------------------------------------------------------------------------------------------------------------------------------------------------------------------------------------------------------------------|--------------------------|
| 1  |                               |     |                                                                                                                                                                                                                                                                                     |                          |
| 2  |                               |     |                                                                                                                                                                                                                                                                                     |                          |
| 3  | Consent or assent             | 26a | Who will obtain informed consent or assent from potential trial participants or authorised surrogates, and how (see Item 32)                                                                                                                                                        | Page 8                   |
| 4  |                               |     |                                                                                                                                                                                                                                                                                     |                          |
| 5  |                               |     |                                                                                                                                                                                                                                                                                     |                          |
| 6  |                               | 26b | Additional consent provisions for collection and use of participant data and biological specimens in ancillary studies, if applicable                                                                                                                                               | Page 10                  |
| 7  |                               |     |                                                                                                                                                                                                                                                                                     |                          |
| 8  |                               |     |                                                                                                                                                                                                                                                                                     |                          |
| 9  | Confidentiality               | 27  | How personal information about potential and enrolled participants will be collected, shared, and maintained in order to protect confidentiality before, during, and after the trial                                                                                                | Page 8                   |
| 10 |                               |     |                                                                                                                                                                                                                                                                                     |                          |
| 11 |                               |     |                                                                                                                                                                                                                                                                                     |                          |
| 12 | Declaration of interests      | 28  | Financial and other competing interests for principal investigators for the overall trial and each study site                                                                                                                                                                       | Page 11                  |
| 13 |                               |     |                                                                                                                                                                                                                                                                                     |                          |
| 14 |                               |     |                                                                                                                                                                                                                                                                                     |                          |
| 15 | Access to data                | 29  | Statement of who will have access to the final trial dataset, and disclosure of contractual agreements that limit such access for investigators                                                                                                                                     | Page 8                   |
| 16 |                               |     |                                                                                                                                                                                                                                                                                     |                          |
| 17 |                               |     |                                                                                                                                                                                                                                                                                     |                          |
| 18 | Ancillary and post-trial care | 30  | Provisions, if any, for ancillary and post-trial care, and for compensation to those who suffer harm from trial participation                                                                                                                                                       | Page 9                   |
| 19 |                               |     |                                                                                                                                                                                                                                                                                     |                          |
| 20 |                               |     |                                                                                                                                                                                                                                                                                     |                          |
| 21 | Dissemination policy          | 31a | Plans for investigators and sponsor to communicate trial results to participants, healthcare professionals, the public, and other relevant groups (eg, via publication, reporting in results databases, or other data sharing arrangements), including any publication restrictions | Page 10                  |
| 22 |                               |     |                                                                                                                                                                                                                                                                                     |                          |
| 23 |                               |     |                                                                                                                                                                                                                                                                                     |                          |
| 24 |                               |     |                                                                                                                                                                                                                                                                                     |                          |
| 25 |                               |     |                                                                                                                                                                                                                                                                                     |                          |
| 26 |                               | 31b | Authorship eligibility guidelines and any intended use of professional writers                                                                                                                                                                                                      | Page 2                   |
| 27 |                               |     |                                                                                                                                                                                                                                                                                     |                          |
| 28 |                               | 31c | Plans, if any, for granting public access to the full protocol, participant-level dataset, and statistical code                                                                                                                                                                     | No plans, not applicable |
| 29 |                               |     |                                                                                                                                                                                                                                                                                     |                          |
| 30 |                               |     |                                                                                                                                                                                                                                                                                     |                          |
| 31 | <b>Appendices</b>             |     |                                                                                                                                                                                                                                                                                     |                          |
| 32 |                               |     |                                                                                                                                                                                                                                                                                     |                          |
| 33 | Informed consent materials    | 32  | Model consent form and other related documentation given to participants and authorised surrogates                                                                                                                                                                                  | Appendix 1               |
| 34 |                               |     |                                                                                                                                                                                                                                                                                     |                          |
| 35 |                               |     |                                                                                                                                                                                                                                                                                     |                          |
| 36 | Biological specimens          | 33  | Plans for collection, laboratory evaluation, and storage of biological specimens for genetic or molecular analysis in the current trial and for future use in ancillary studies, if applicable                                                                                      | Page 10                  |
| 37 |                               |     |                                                                                                                                                                                                                                                                                     |                          |
| 38 |                               |     |                                                                                                                                                                                                                                                                                     |                          |

\*It is strongly recommended that this checklist be read in conjunction with the SPIRIT 2013 Explanation & Elaboration for important clarification on the items. Amendments to the protocol should be tracked and dated. The SPIRIT checklist is copyrighted by the SPIRIT Group under the Creative Commons "[Attribution-NonCommercial-NoDerivs 3.0 Unported](https://creativecommons.org/licenses/by-nc-nd/3.0/)" license.
